# Supplementary material for: Pyridine C3-arylation of nicotinic acids accessible via a multicomponent reaction: an entry to all-substituted-3,4-diarylated pyridines
Source: Royal Society of Chemistry journal article supplement (doi:10.1039/c6ra28299g), 2017-01-01

## Supporting Information

### **Pyridine C3-arylation of nicotinic acids accessible via multicomponent reaction: An entry to all-substituted-3,4- diaryled pyridines**

Sankar K Guchhait,<sup>a</sup> Neha Hura,<sup>a</sup> Kanchan Sinha<sup>b</sup> and Dulal Panda<sup>b</sup>

<sup>a</sup>*Department of Medicinal Chemistry, National Institute of Pharmaceutical Education and Research (NIPER), S. A. S. Nagar (Mohali)–160062, India*

*E-mail: [skguchhait@niper.ac.in](mailto:skguchhait@niper.ac.in); Fax: +91 172 2214692; Tel: +91 172 2214683*

<sup>b</sup>*Department of Biosciences and Bioengineering, Indian Institute of Technology Bombay, Powai, Mumbai 400076, India*

## Contents

|                                                                                                          |    |
|----------------------------------------------------------------------------------------------------------|----|
| 1. Dehydrogenative aromatization reactions utilizing different conditions (Table1).....                  | S3 |
| 2. Optimization for mono-hydrolysis of compound <b>4a</b> (Table 2).....                                 | S3 |
| 3. Inhibition of cell proliferation upon treatment of HeLa cells with 5 $\mu$ M compounds (Table 3)..... | S4 |
| 4. Effects of compounds <b>8b, 8f, 8j, 8p</b> on the assembly of tubulin <i>in vitro</i> (Figure 1)..... | S5 |
| 5. References.....                                                                                       | S5 |
| 6. NMR spectra of compounds ( <b>3a, 4a, 5a, 8a-8t</b> ).....                                            | S6 |

## 1. Dehydrogenative aromatization reactions utilizing different conditions (Table1)

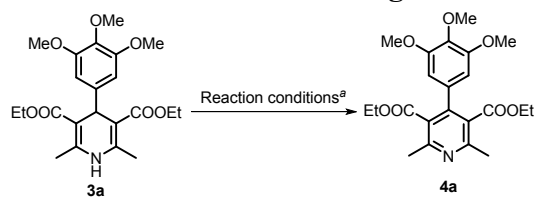

| Entry          | Reaction conditions <sup>a</sup>                                           | Time (h) | % Yield <sup>b</sup> |
|----------------|----------------------------------------------------------------------------|----------|----------------------|
| 1 <sup>1</sup> | NaClO <sub>2</sub> (1.5 equiv), EtOH:Water(1:1), conc. HCl (0.2 mL), 20 °C | 3        | 70                   |
| 2 <sup>2</sup> | Mn(OAc) <sub>3</sub> , (2 equiv), AcOH (5 mL), rt                          | 2        | 90                   |
| 3 <sup>3</sup> | Fe(ClO <sub>4</sub> ) <sub>3</sub> (2 mol%), AcOH (5 mL), rt               | 4        | 60                   |

<sup>a</sup> Reaction was done at 1 mmol scale, <sup>b</sup>Yield obtained after recrystallization

## 2. Optimization for mono-hydrolysis of compound 4a (Table 2)<sup>4,5</sup>

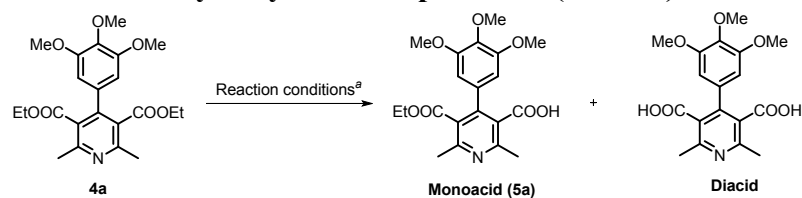

| Entry | Base (equiv)    | Solvent          | T (°C) | Yield (%) <sup>b</sup> |        |                     |
|-------|-----------------|------------------|--------|------------------------|--------|---------------------|
|       |                 |                  |        | Monoacid               | Diacid | Substrate recovered |
| 1     | KOH(2)          | EtOH:Water (3:1) | 80     | 50                     | 29     | 20                  |
| 2     | KOH(2)          | EtOH:Water (3:1) | 65     | 60                     | 20     | 20                  |
| 3     | KOH(2)          | EtOH:Water (3:1) | 50     | 65                     | 7      | 26                  |
| 4     | NaOH(2)         | EtOH:Water (3:1) | 50     | 67                     | 5      | 27                  |
| 5     | KOH(2)          | EtOH             | 50     | 55                     | 25     | 20                  |
| 6     | KOH(2)          | MeOH             | 50     | 60                     | 30     | 10                  |
| 7     | NaOH (2)        | THF:Water (1:10) | 0-50   | 0                      | 0      | 100                 |
| 8     | KOH(2), TBAB(1) | EtOH:Water (3:1) | 50     | 65                     | 10     | 25                  |

<sup>a</sup> Reactions were performed at 0.5 mmol scale, reaction time 24 h; <sup>b</sup> Isolated yield

3. Inhibition of cell proliferation upon treatment of HeLa cells with 5  $\mu$ M compounds (Table 3)

| Diaryled-pyridine compounds (5 $\mu$ M) | % Inhibition |
|-----------------------------------------|--------------|
| 8a                                      | 11 $\pm$ 9   |
| 8b                                      | 64 $\pm$ 5   |
| 8c                                      | 52 $\pm$ 5   |
| 8d                                      | 50 $\pm$ 10  |
| 8e                                      | 3 $\pm$ 2    |
| 8f                                      | 73 $\pm$ 5   |
| 8g                                      | 41 $\pm$ 12  |
| 8h                                      | 45 $\pm$ 11  |
| 8i                                      | 40 $\pm$ 11  |
| 8j                                      | 65 $\pm$ 8   |
| 8k                                      | 8 $\pm$ 4    |
| 8l                                      | 60 $\pm$ 2   |
| 8m                                      | 47 $\pm$ 15  |
| 8n                                      | 8 $\pm$ 2    |
| 8o                                      | 48 $\pm$ 10  |
| 8p                                      | 64 $\pm$ 2   |
| 8q                                      | 54 $\pm$ 12  |
| 8r                                      | 28 $\pm$ 3   |
| 8s                                      | 18 $\pm$ 3   |
| 8t                                      | 29 $\pm$ 19  |

#### 4. Effects of compounds 8b, 8f, 8j, 8p on the assembly of tubulin *in vitro*

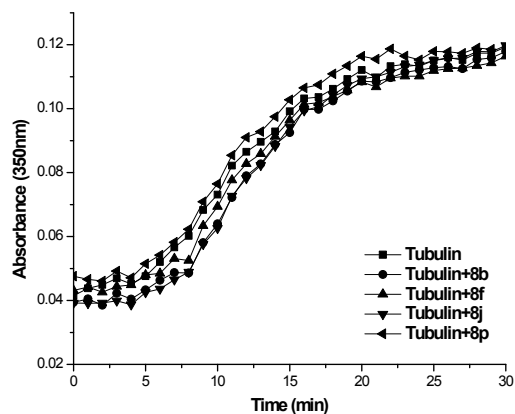

Figure 1: Effects of compounds 8b, 8f, 8j, 8p on the assembly of tubulin *in vitro*. Tubulin(12  $\mu$ M) was polymerized in the presence of 1 mM GTP and 10% DMSO without or with 20  $\mu$ M of compound 8b, 8f, 8j, 8p. Three independent sets of experiments were performed for each compound. Here is one of the representative set.

#### 5. References

1. R. S. Varma and D. Kumar, *Tet. Lett.*, 1999, **40**, 21.
2. X. Liao, W. Lin, J. Lu and C. Wang, *Tet. Lett.*, 2010, **51**, 3859.
3. M. M. Heravi, F. K. Behbahani, H. A. Oskooie and R. H. Shoar, *Tet. Lett.*, 2005, **46**, 2775.
4. J. Duan, X. Song, H. Yan and X. Song, *Molecules*, 2011, **16**, 3845.
5. M. Chouhan, R. Sharma and V. A. Nair, *Org. Lett.*, 2012, **14**, 5672.

## 6. NMR spectra of compounds (3a, 4a, 5a, 8a-8t)

Scheme 1, (3a): <sup>1</sup>H NMR

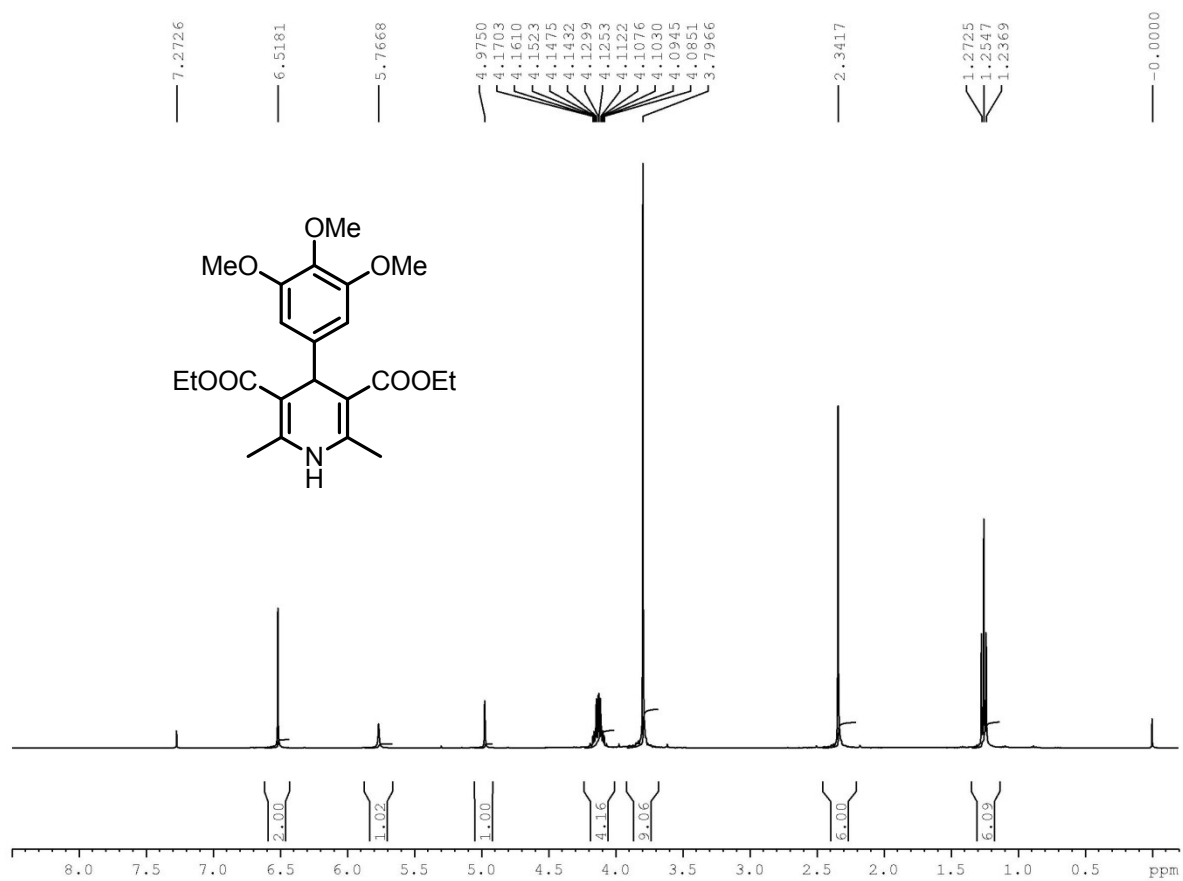

Scheme 1 (3a): <sup>13</sup>C NMR

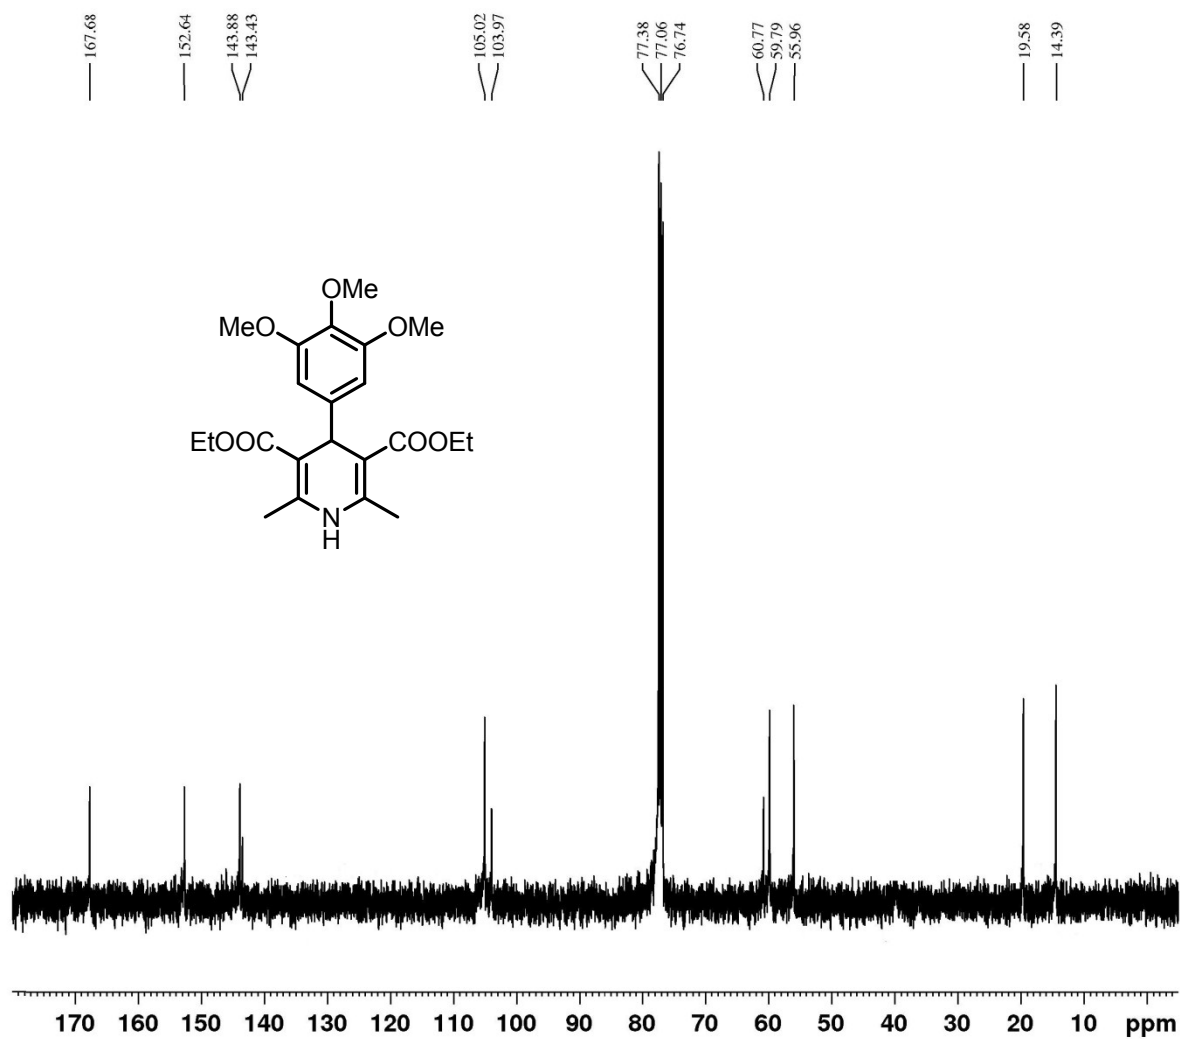

Scheme 1, (4a): <sup>1</sup>H NMR

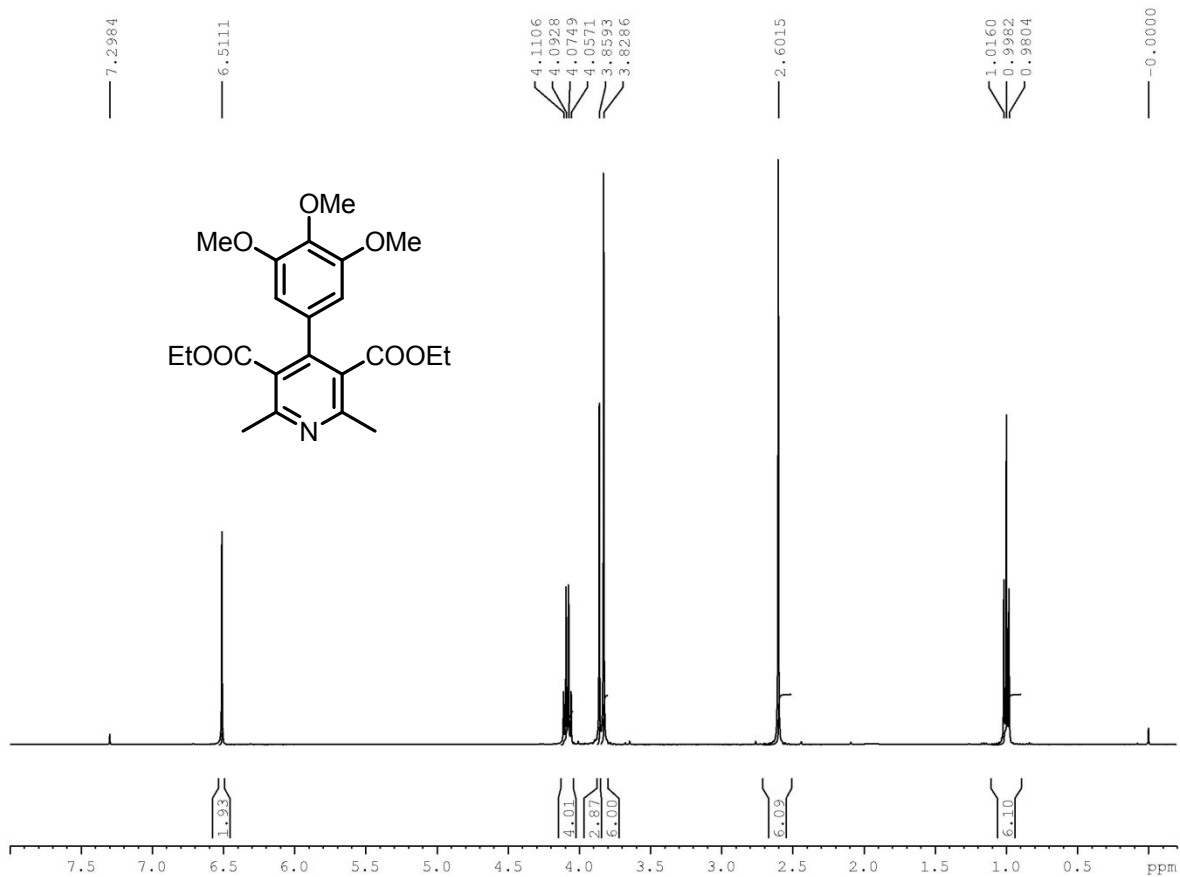



Scheme 1 (4a): <sup>13</sup>C NMR

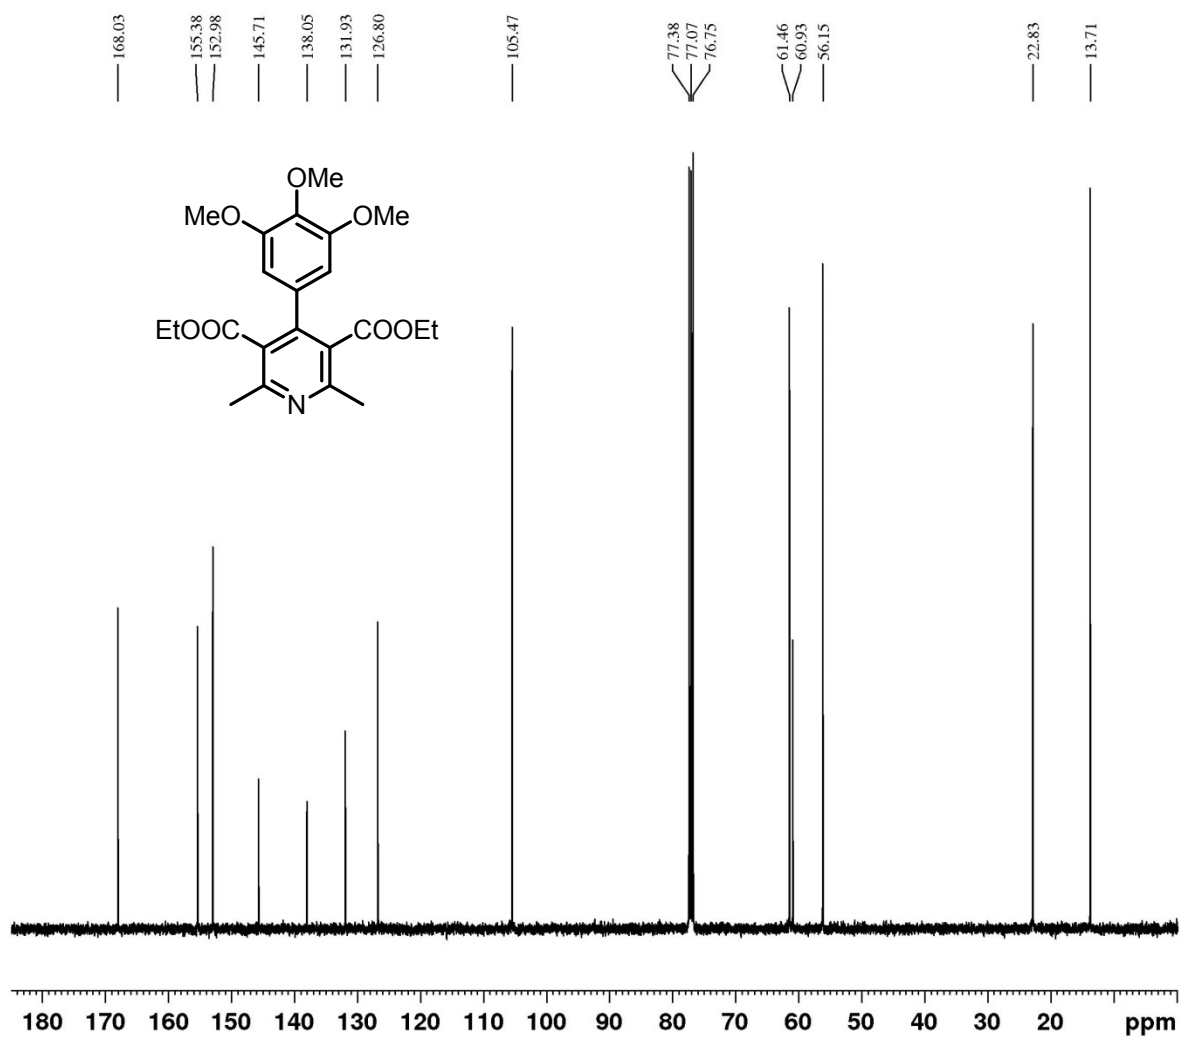

Scheme 1, (5a): <sup>1</sup>H NMR

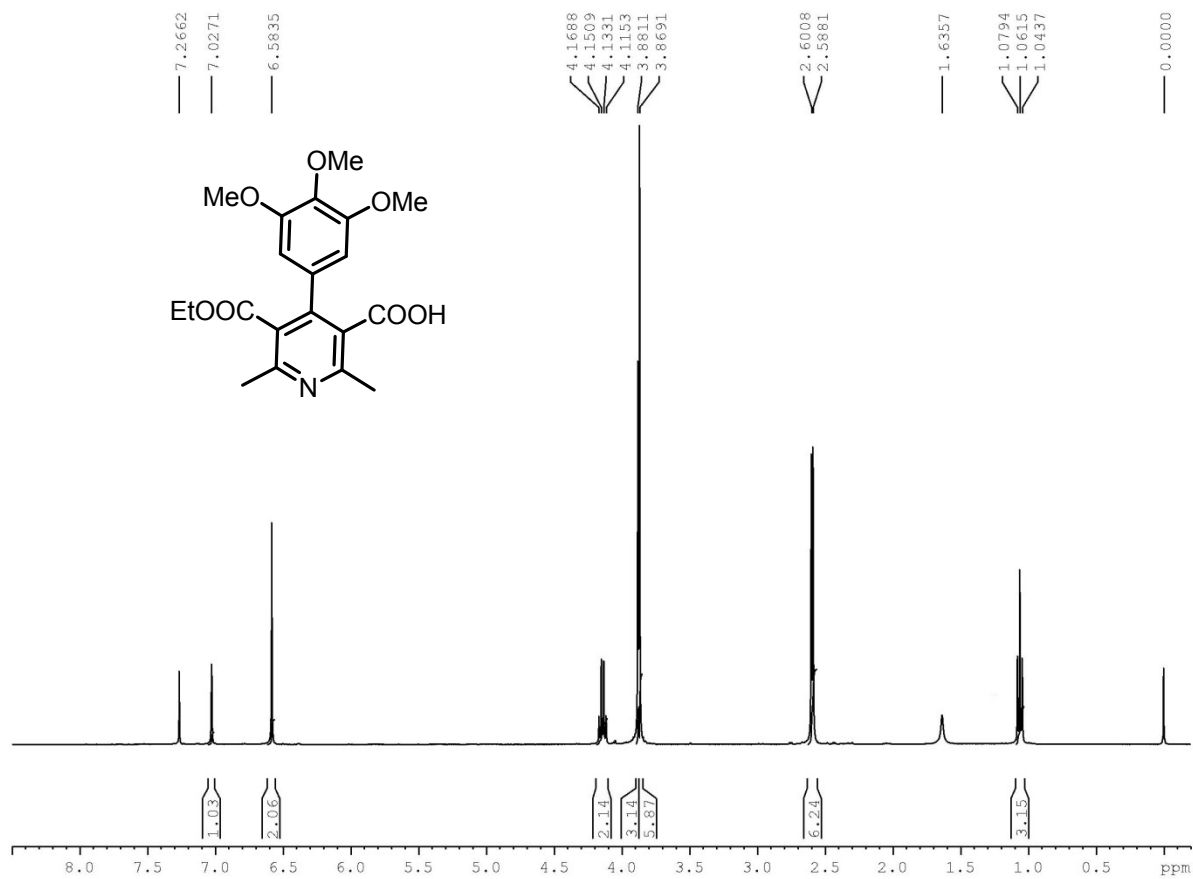

Scheme 1 (5a):  $^{13}\text{C}$  NMR

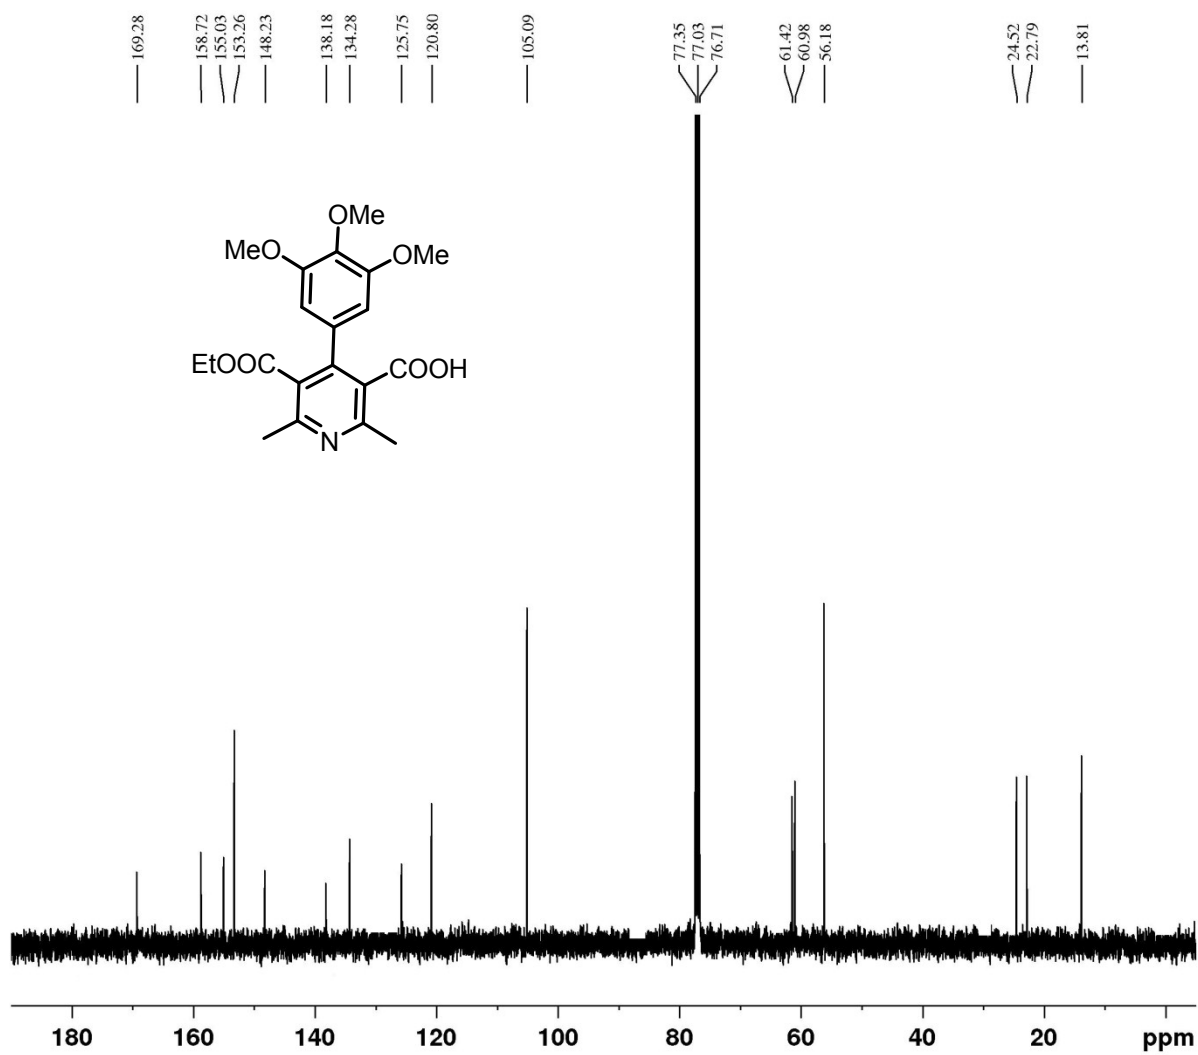

Scheme 4, Entry 1 (8a): <sup>1</sup>H NMR

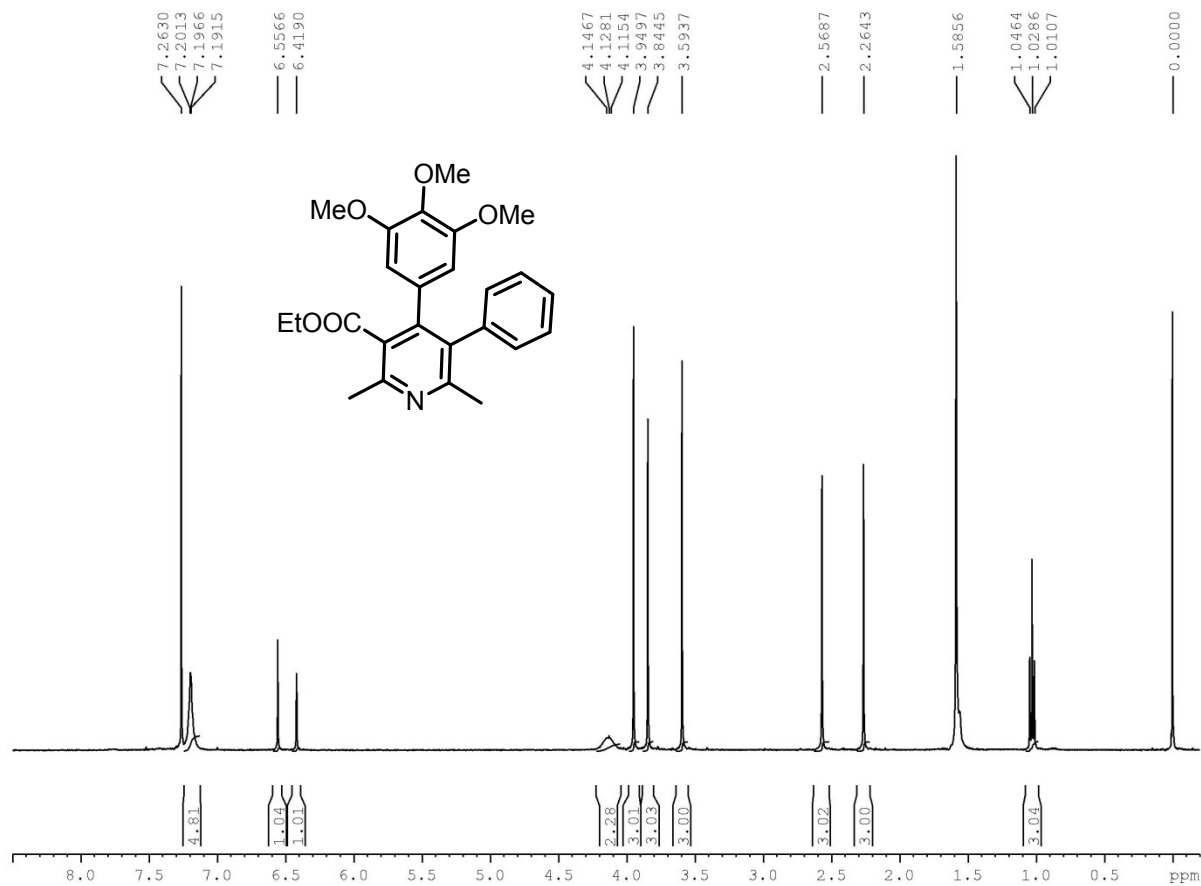

Scheme 4, Entry 1 (8a): <sup>13</sup>C NMR

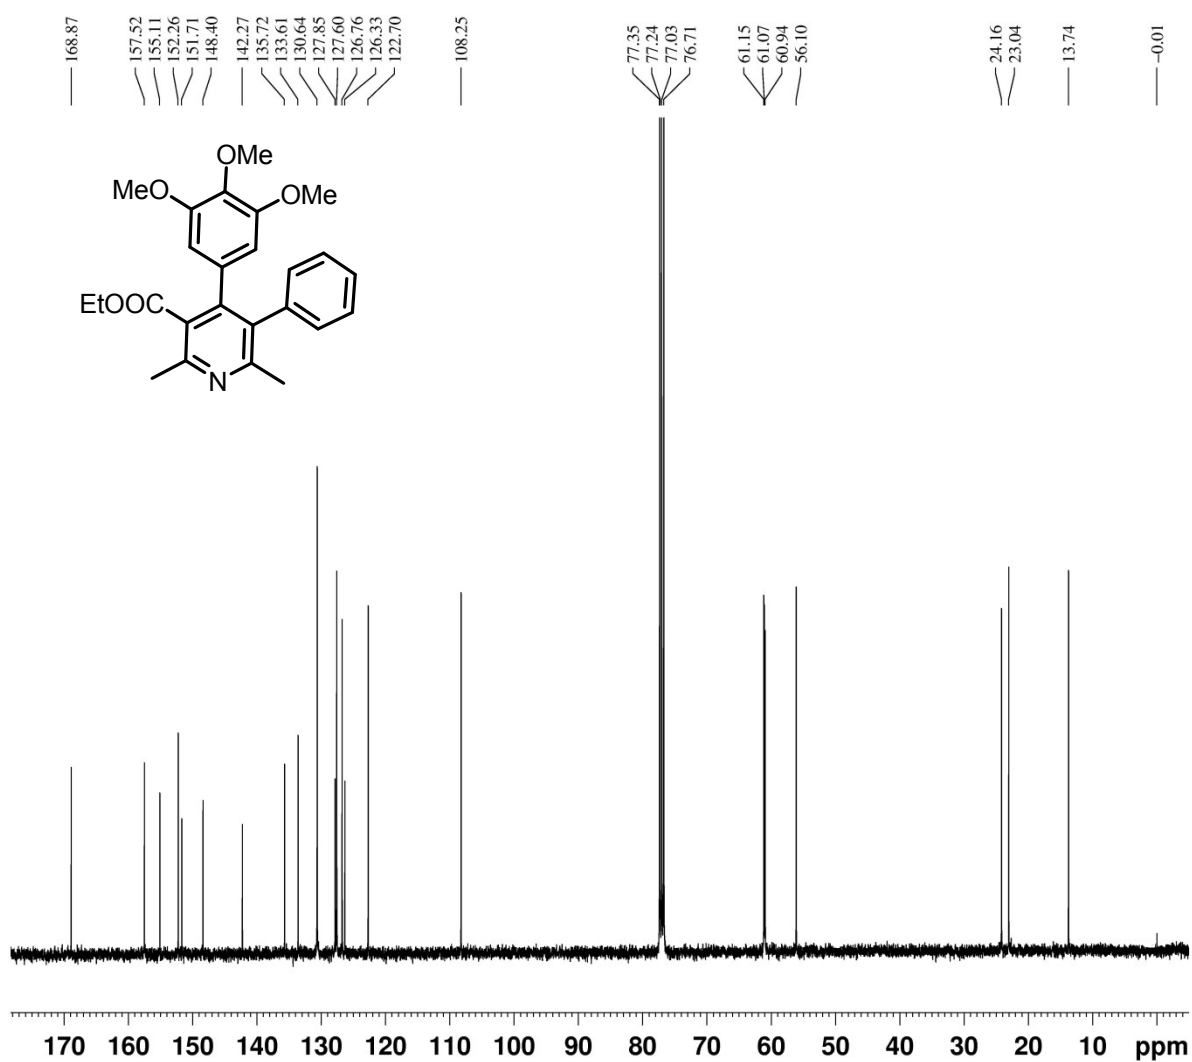

Scheme 4, Entry 2 (8b): <sup>1</sup>H NMR

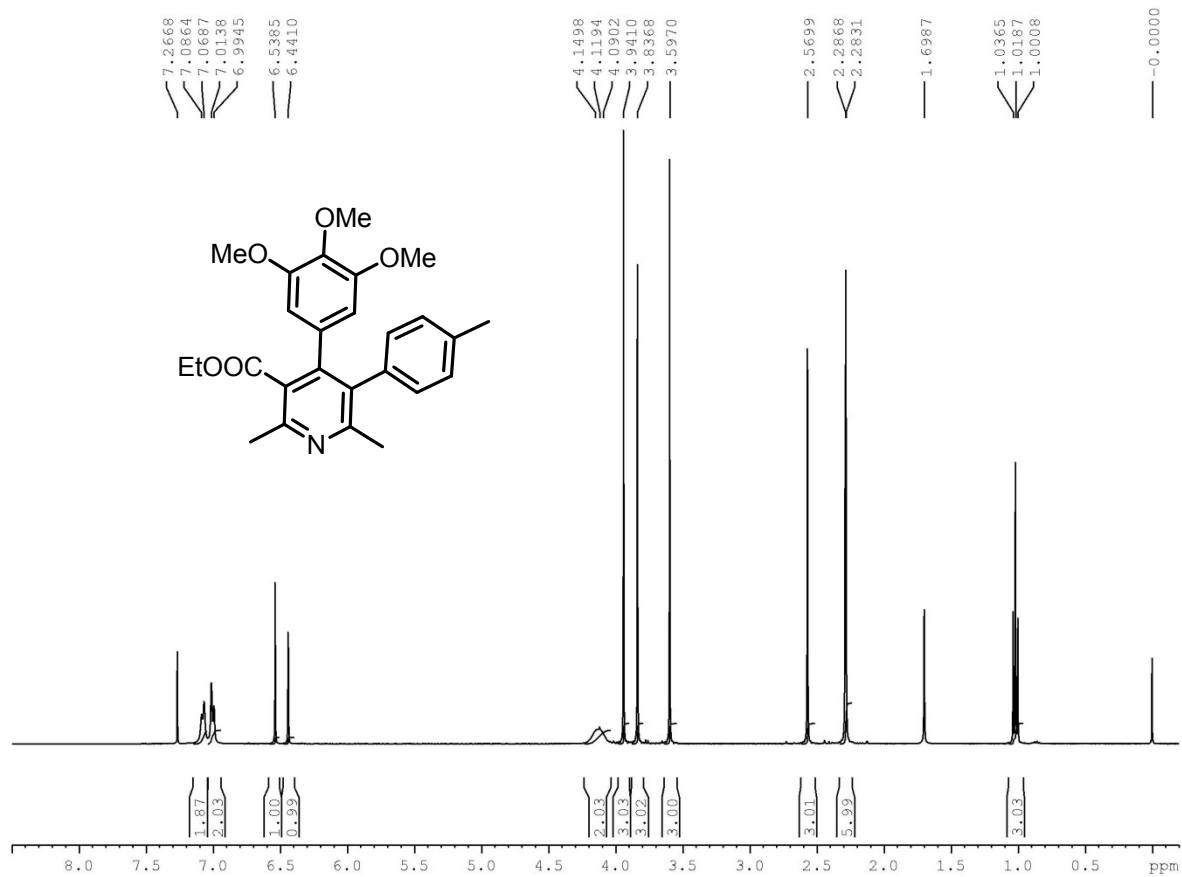

Scheme 4, Entry 2 (8b): <sup>13</sup>C NMR

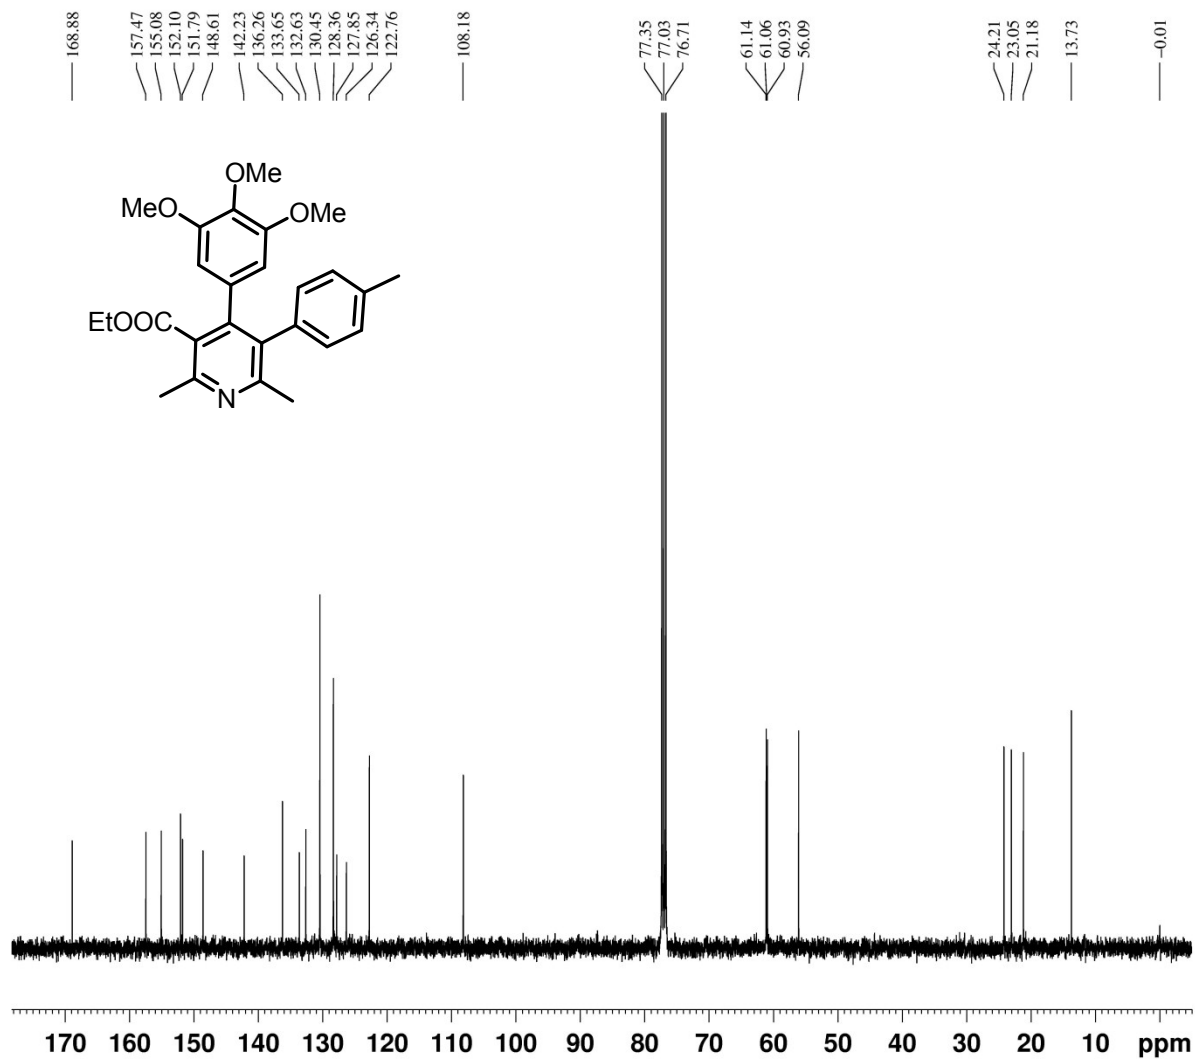

Scheme 4, Entry 3 (8c): <sup>1</sup>H NMR

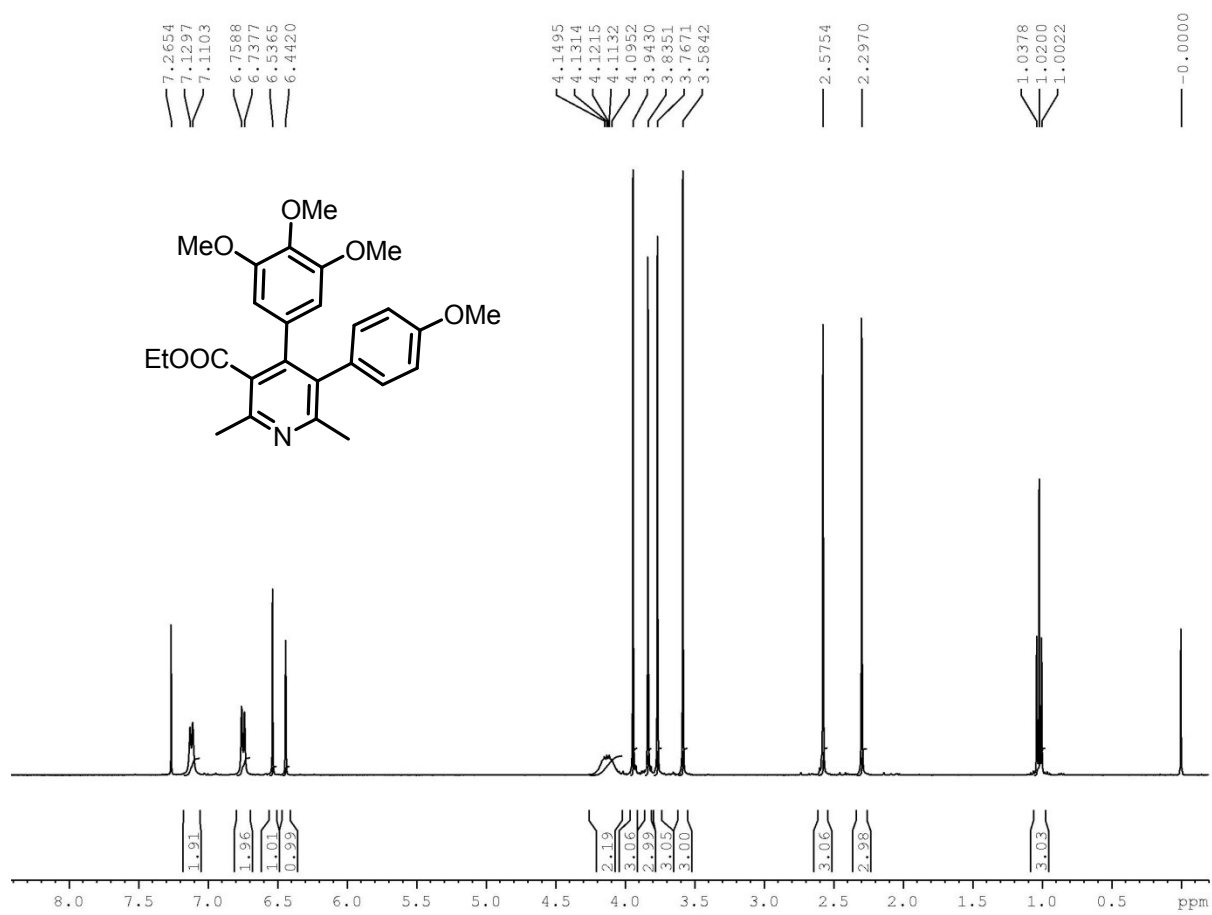



Scheme 4, Entry 3 (8c):  $^{13}\text{C}$  NMR

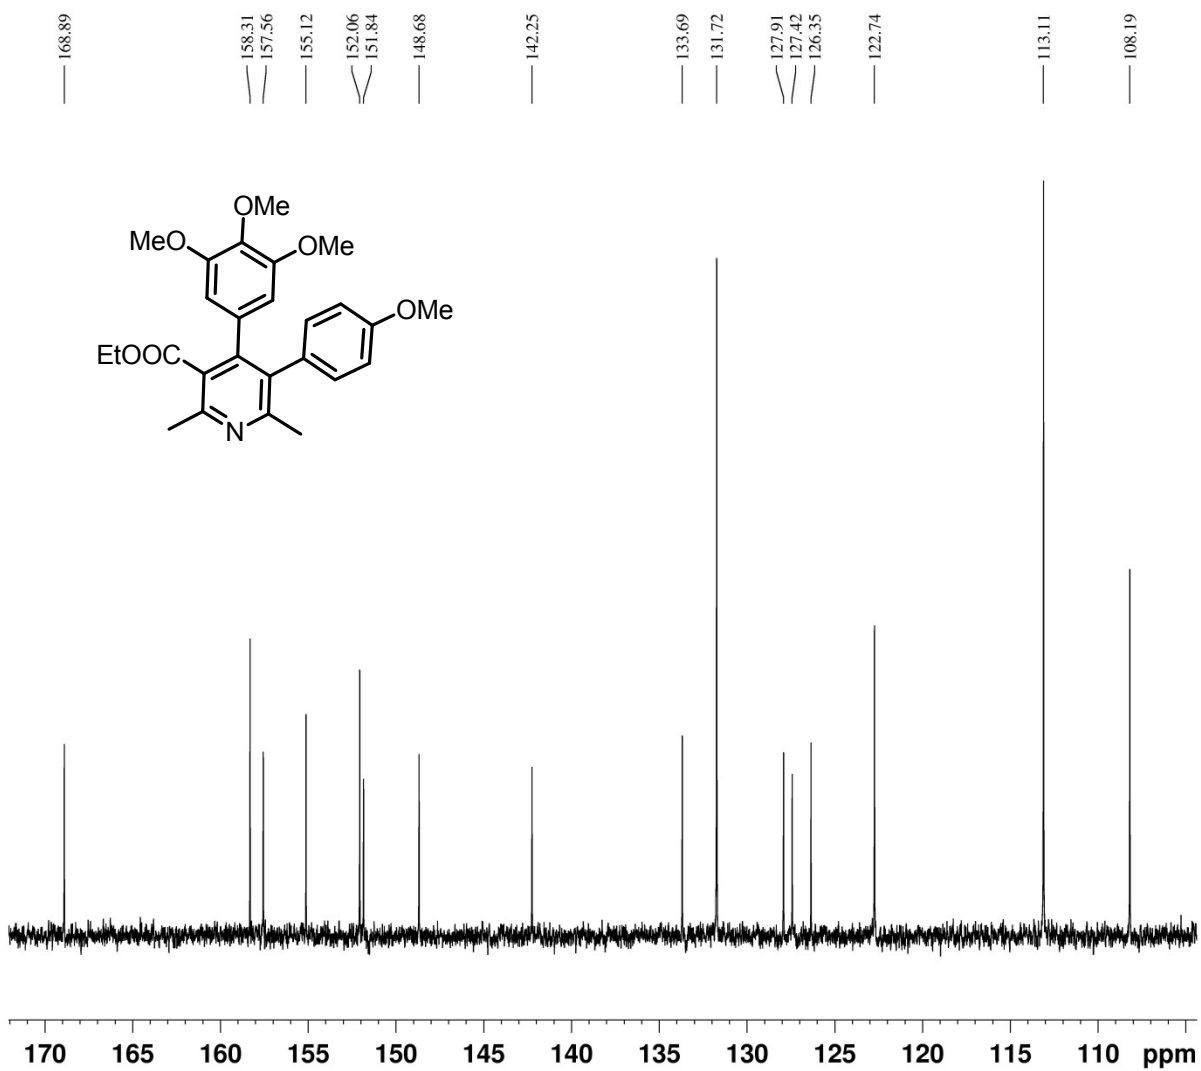

Scheme 4, Entry 4 (8d): <sup>1</sup>H NMR

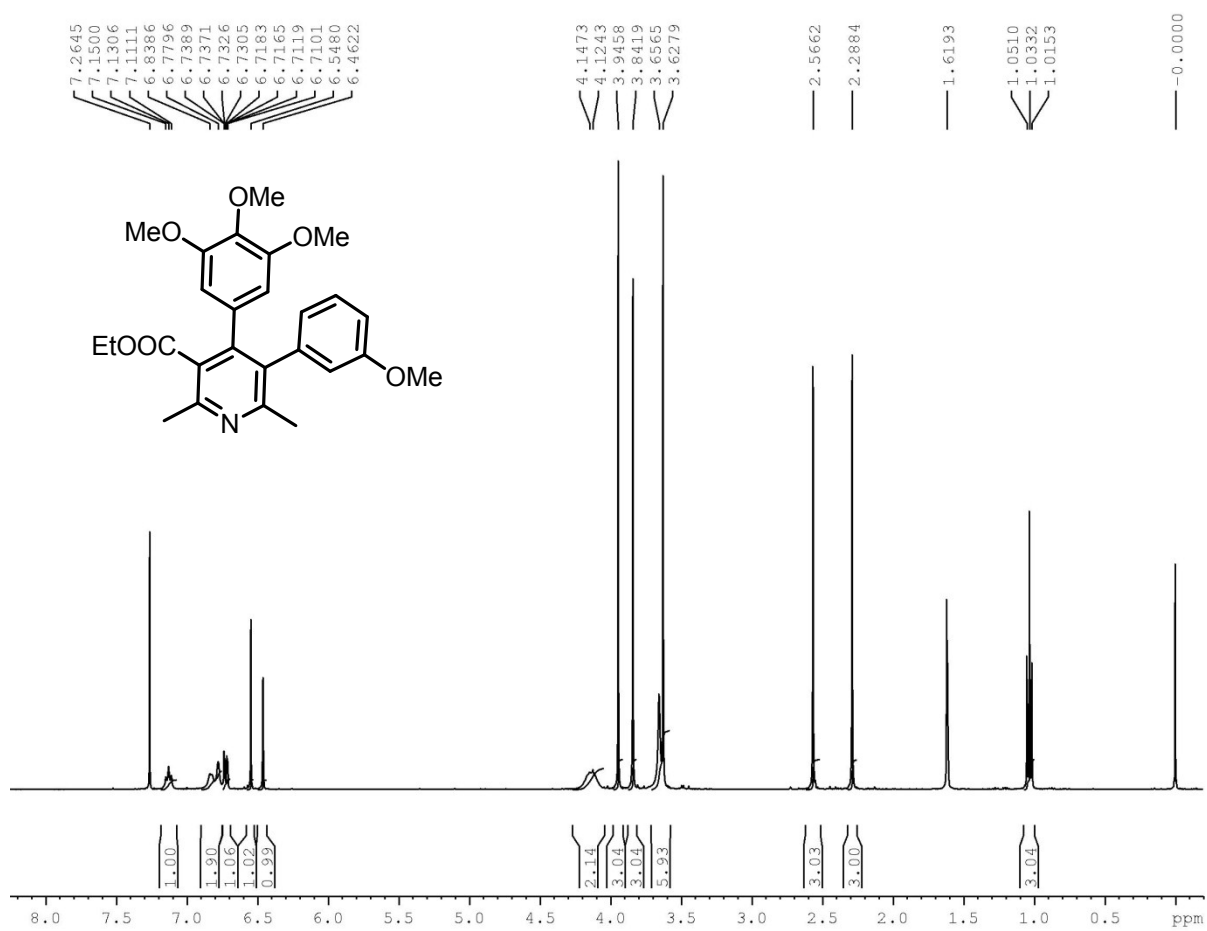

Scheme 4, Entry 4 (8d): <sup>13</sup>C NMR

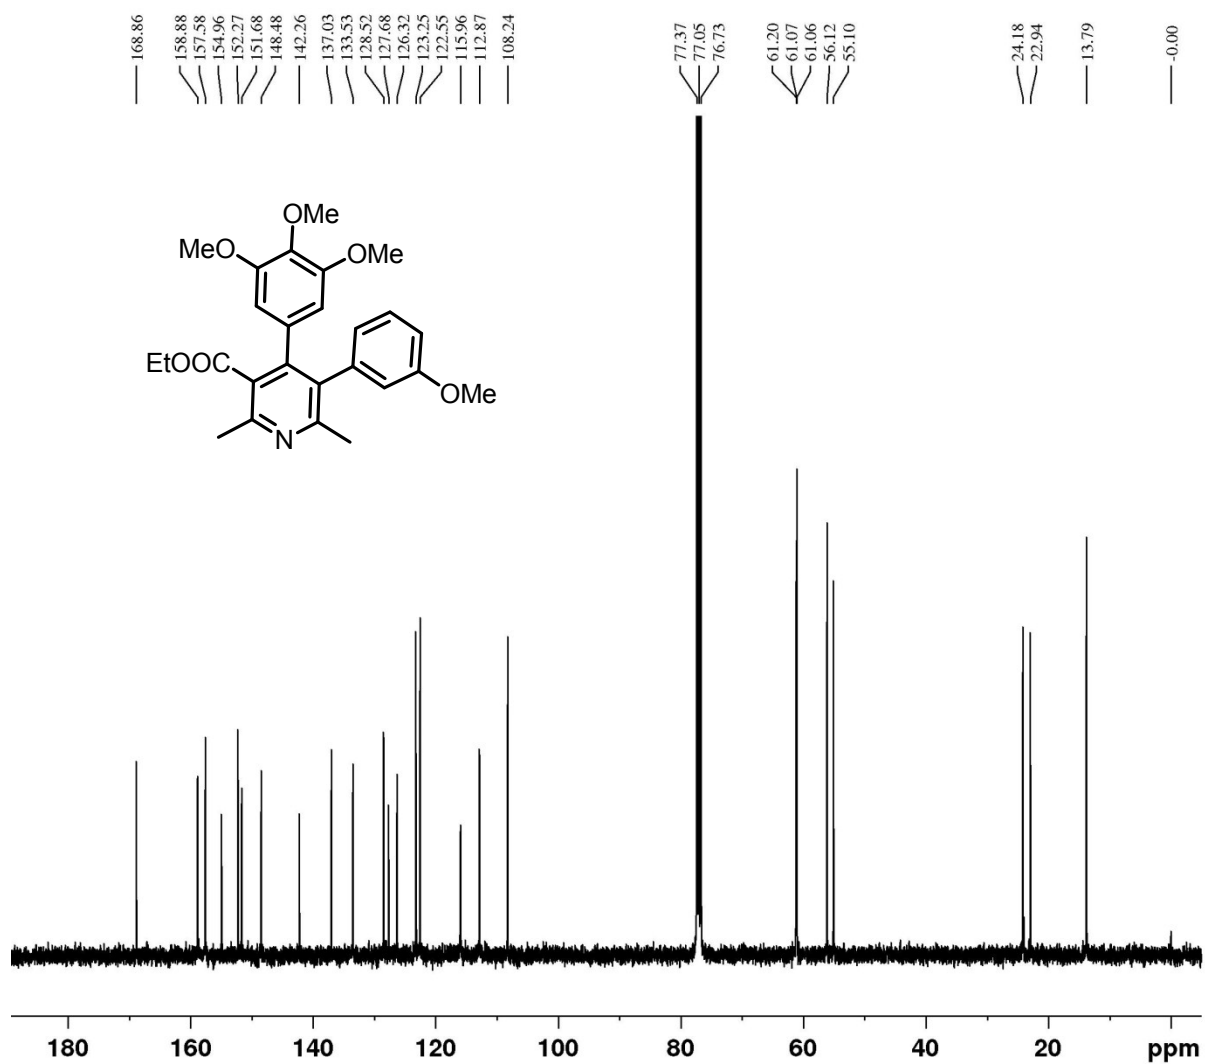

Scheme 4, Entry 5 (8e): <sup>1</sup>H NMR

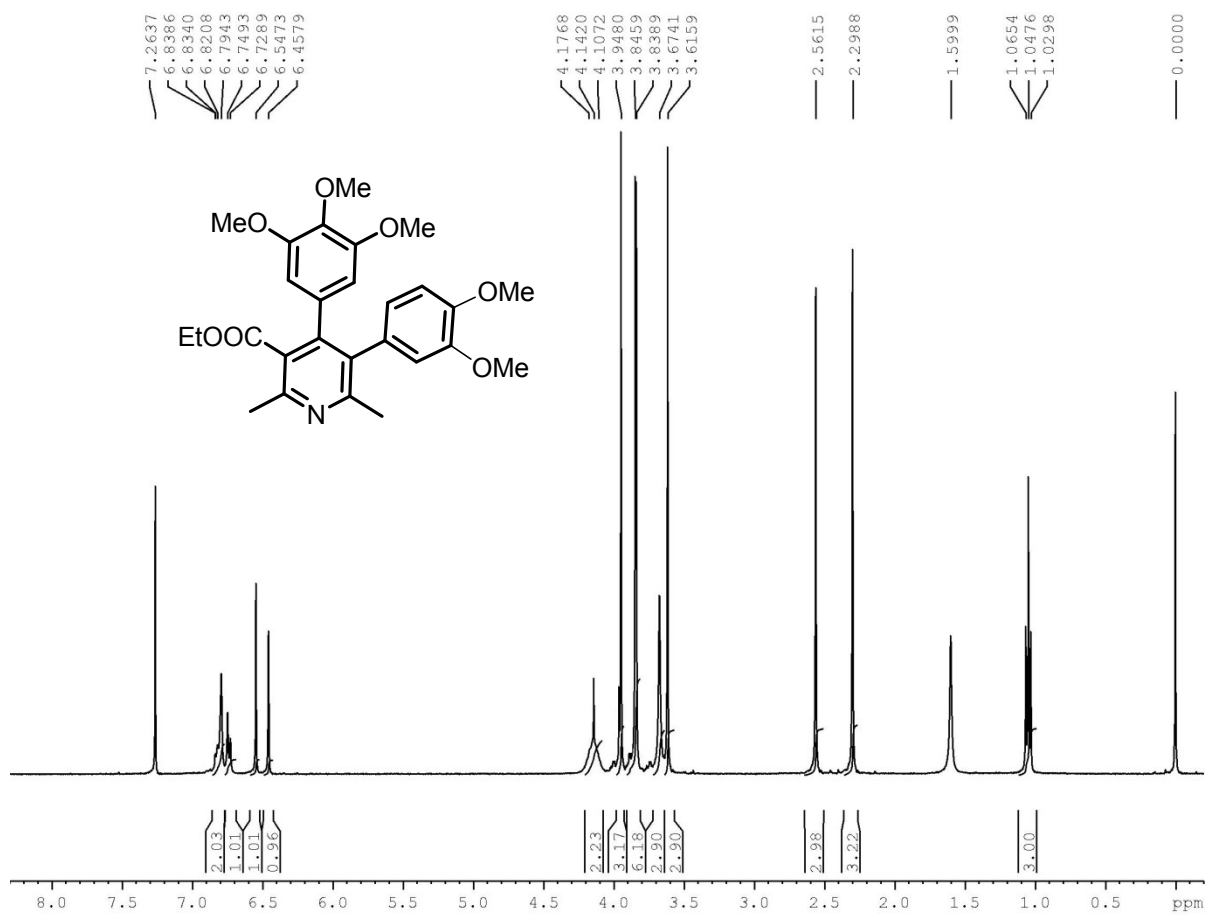

Scheme 4, Entry 5 (8e): <sup>13</sup>C NMR

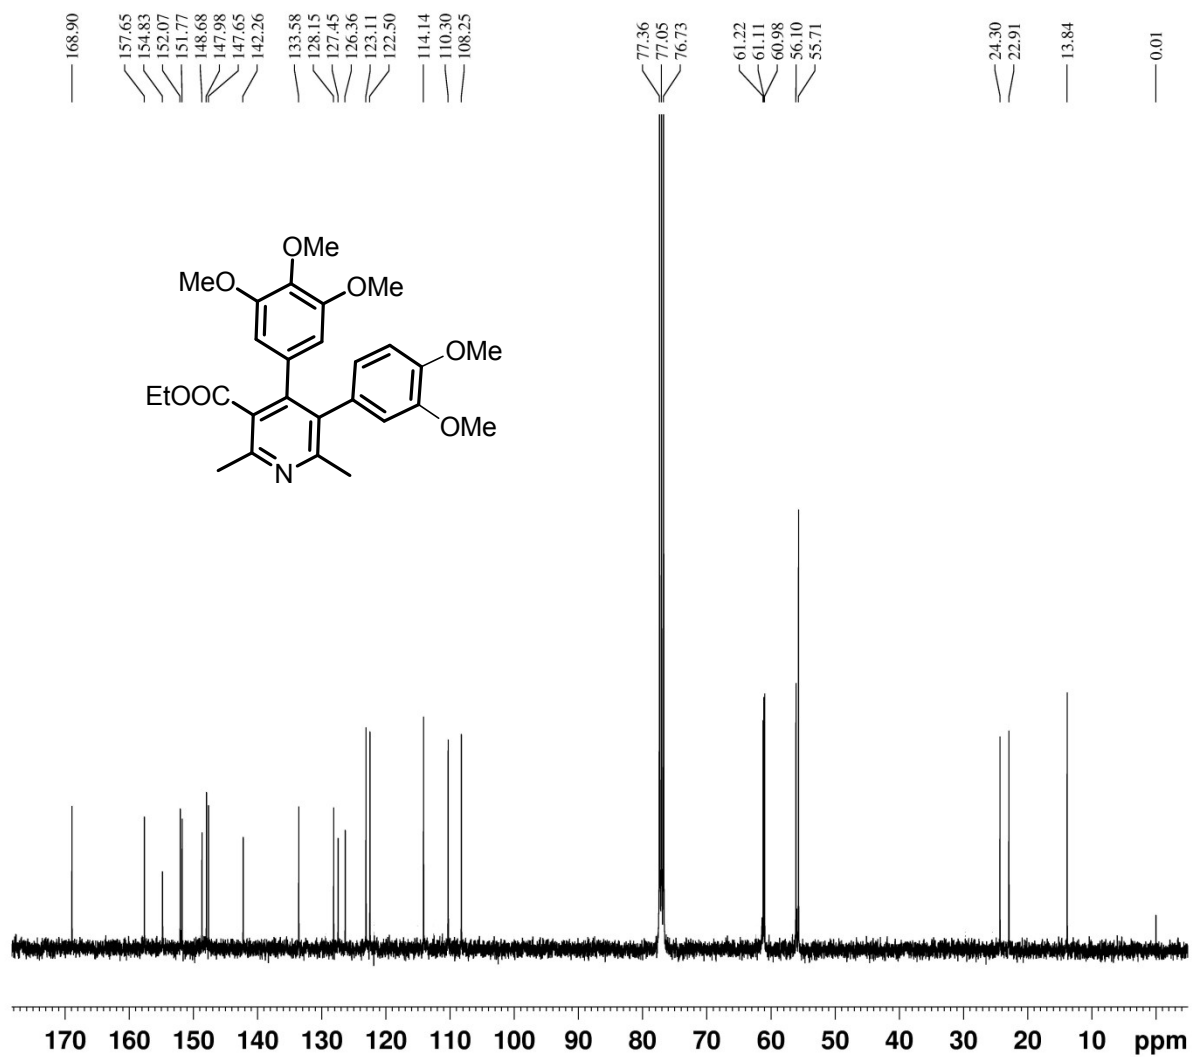

Scheme 4, Entry 6 (8f): <sup>1</sup>H NMR

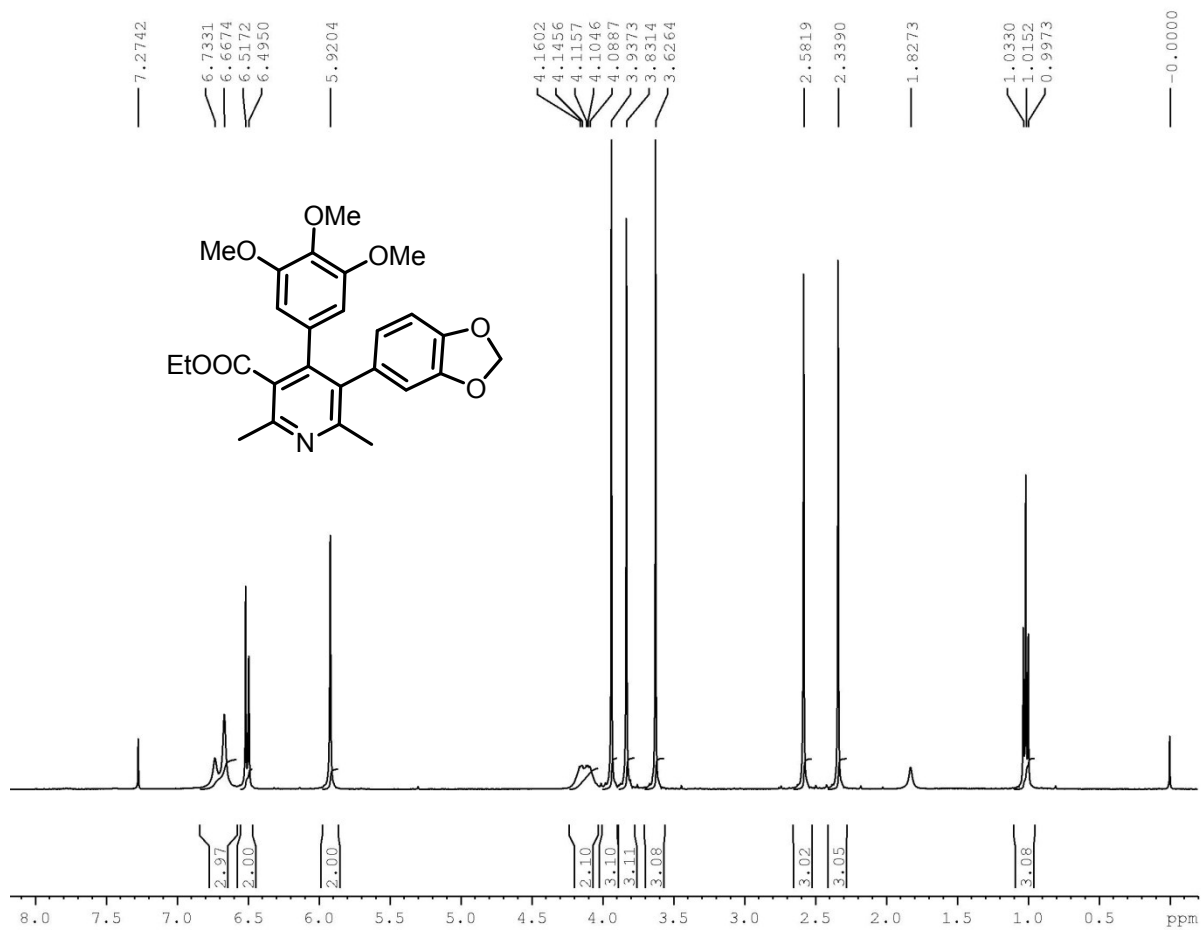

Scheme 4, Entry 6 (8f): <sup>13</sup>C NMR

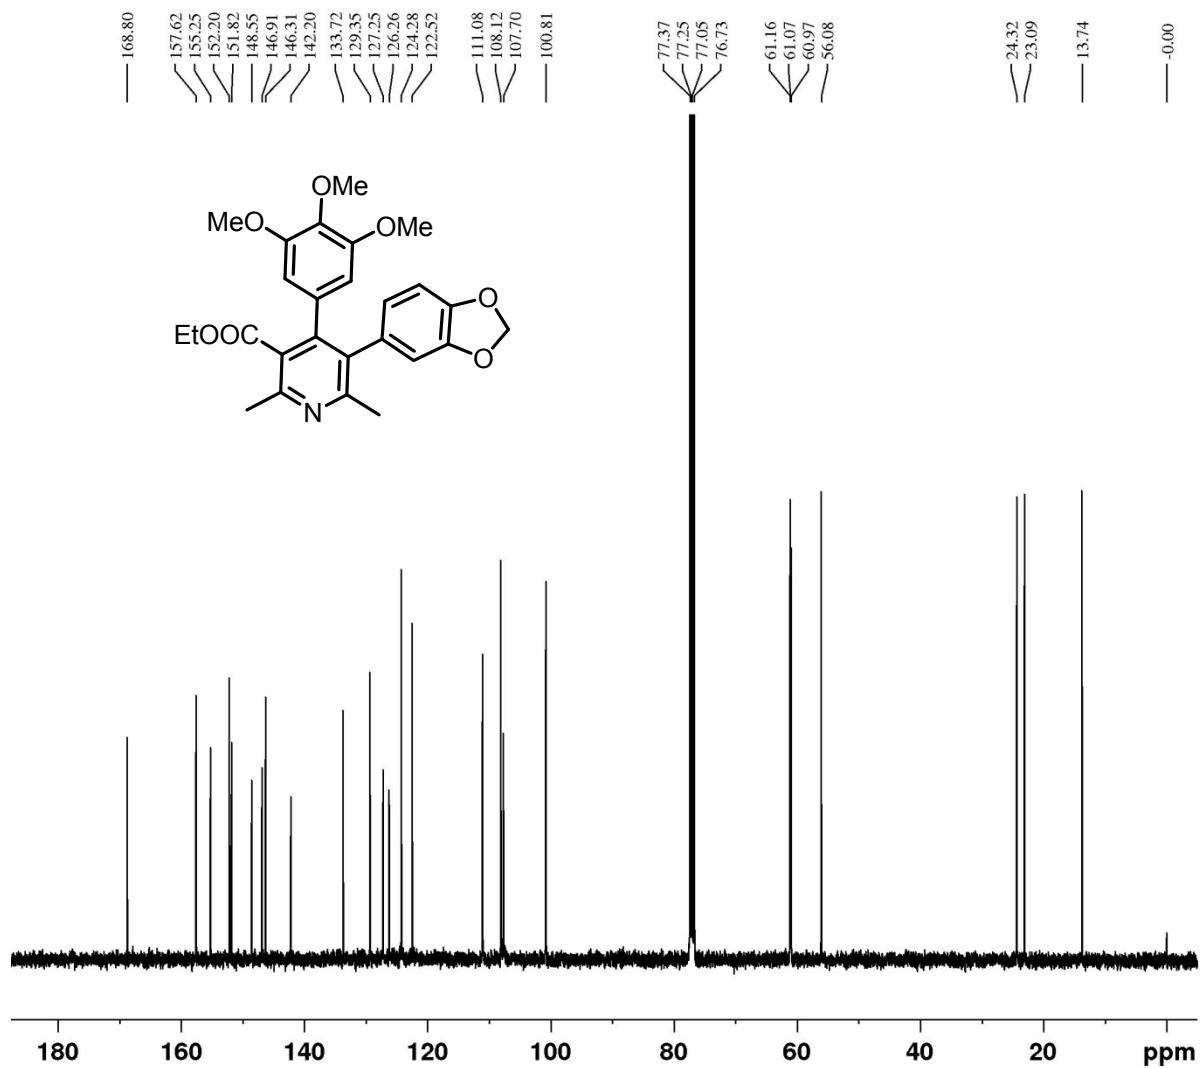

Scheme 4, Entry 7 (8g): <sup>1</sup>H NMR

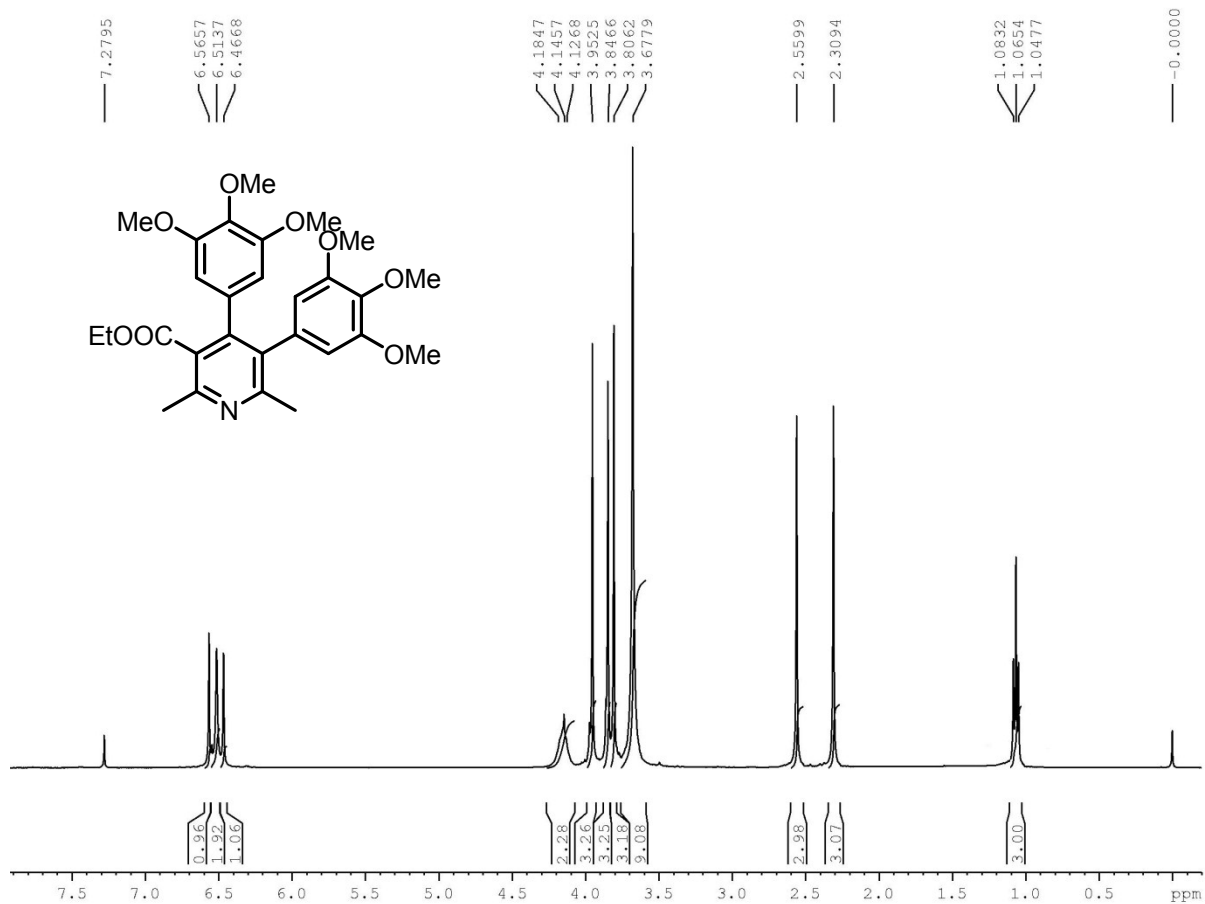



Scheme 4, Entry 7 (8g): <sup>13</sup>C NMR

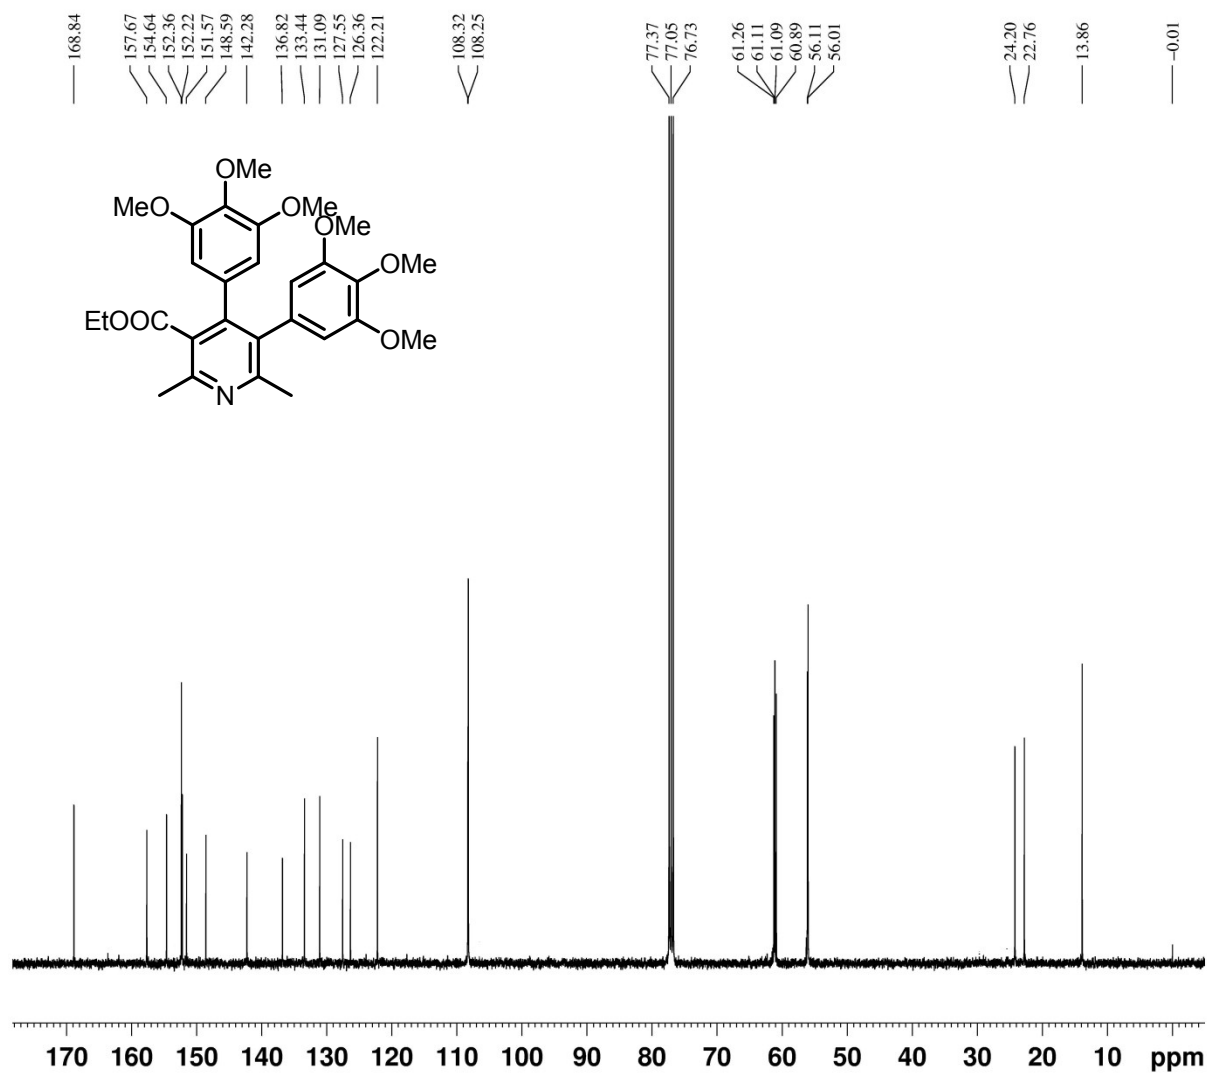

Scheme 4, Entry 8 (8h): <sup>1</sup>H NMR

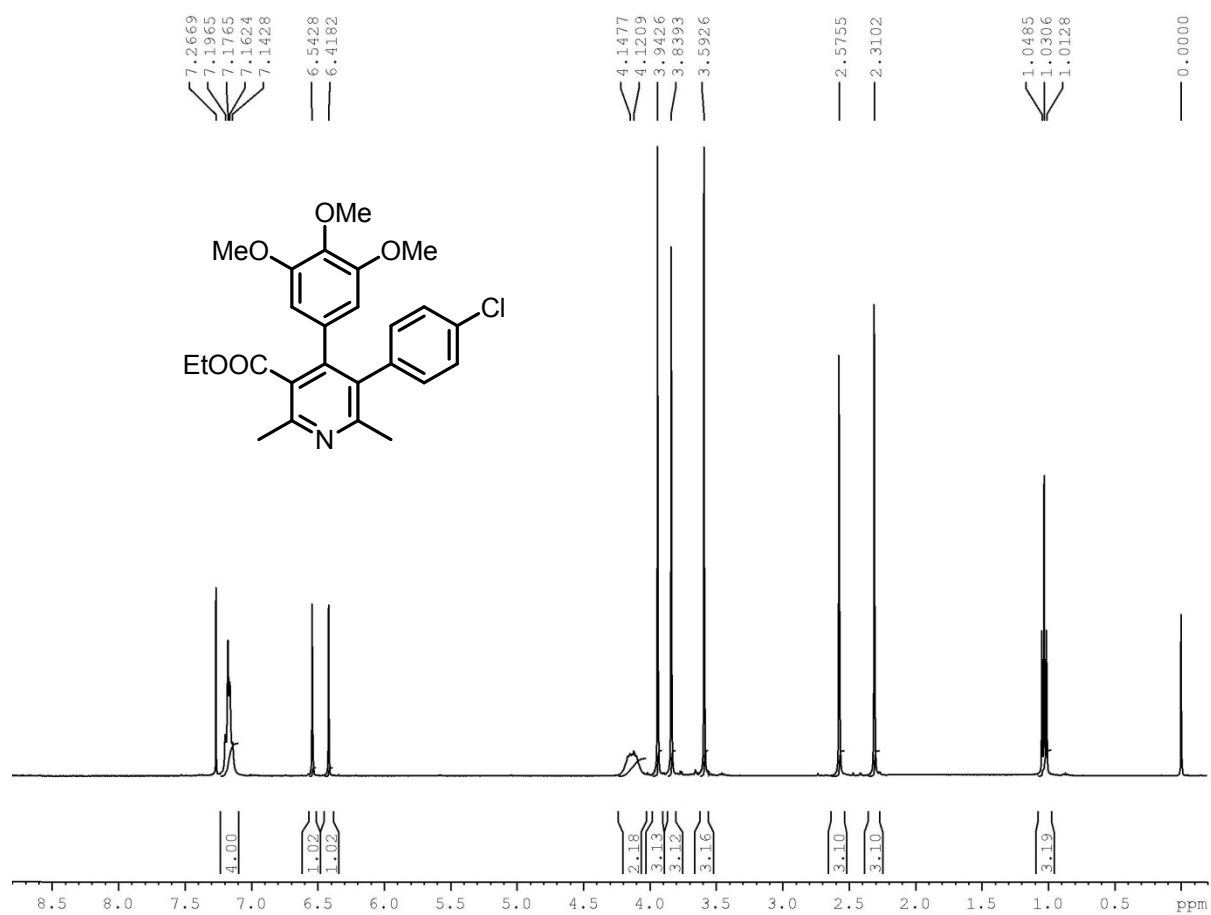

Scheme 4, Entry 8 (8h): <sup>13</sup>C NMR

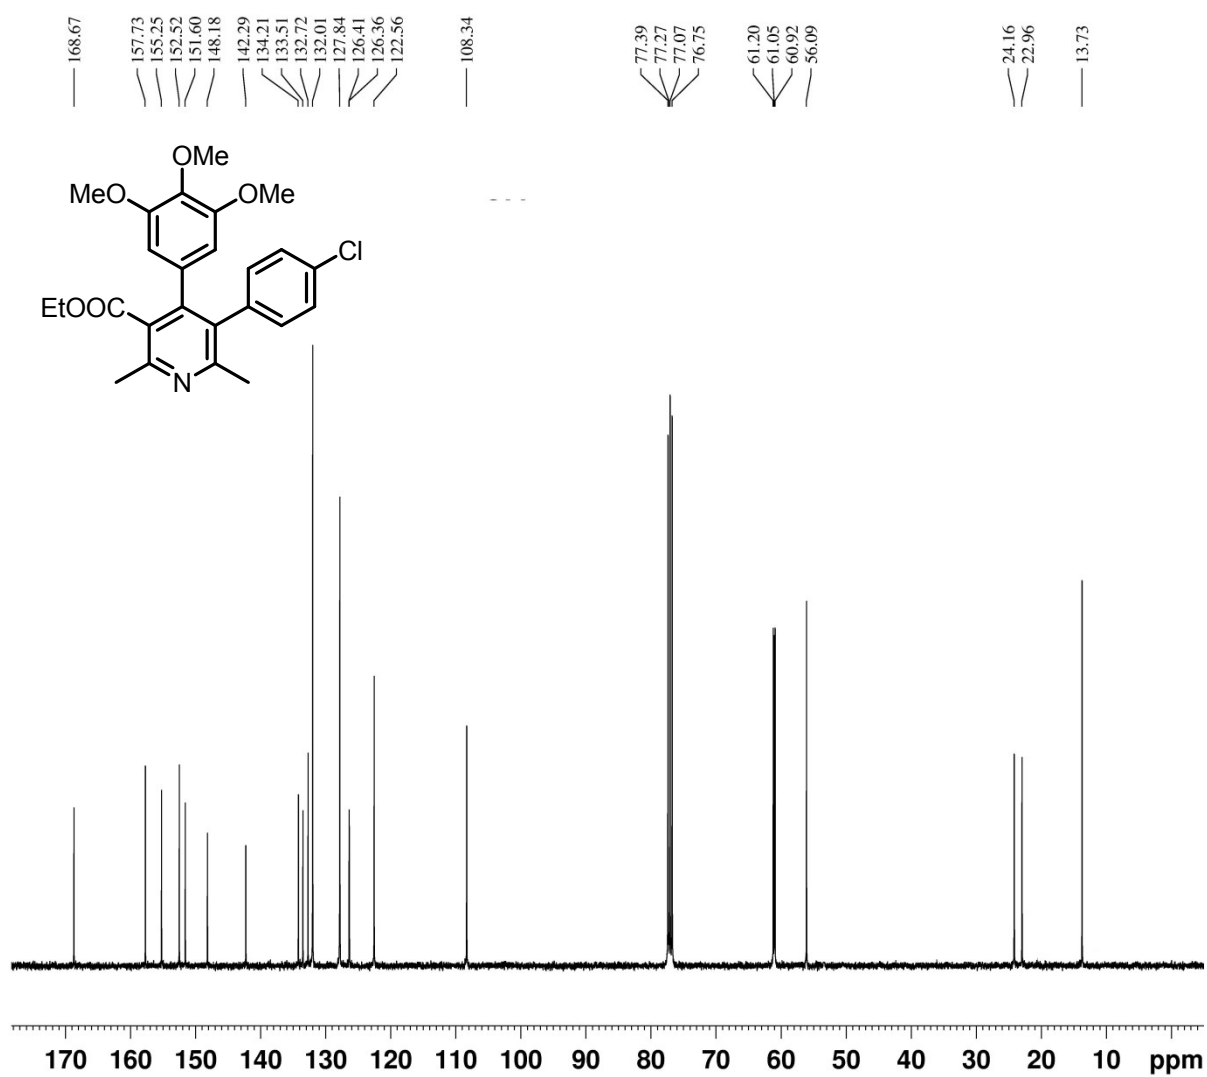

Scheme 4, Entry 9 (8i): <sup>1</sup>H NMR

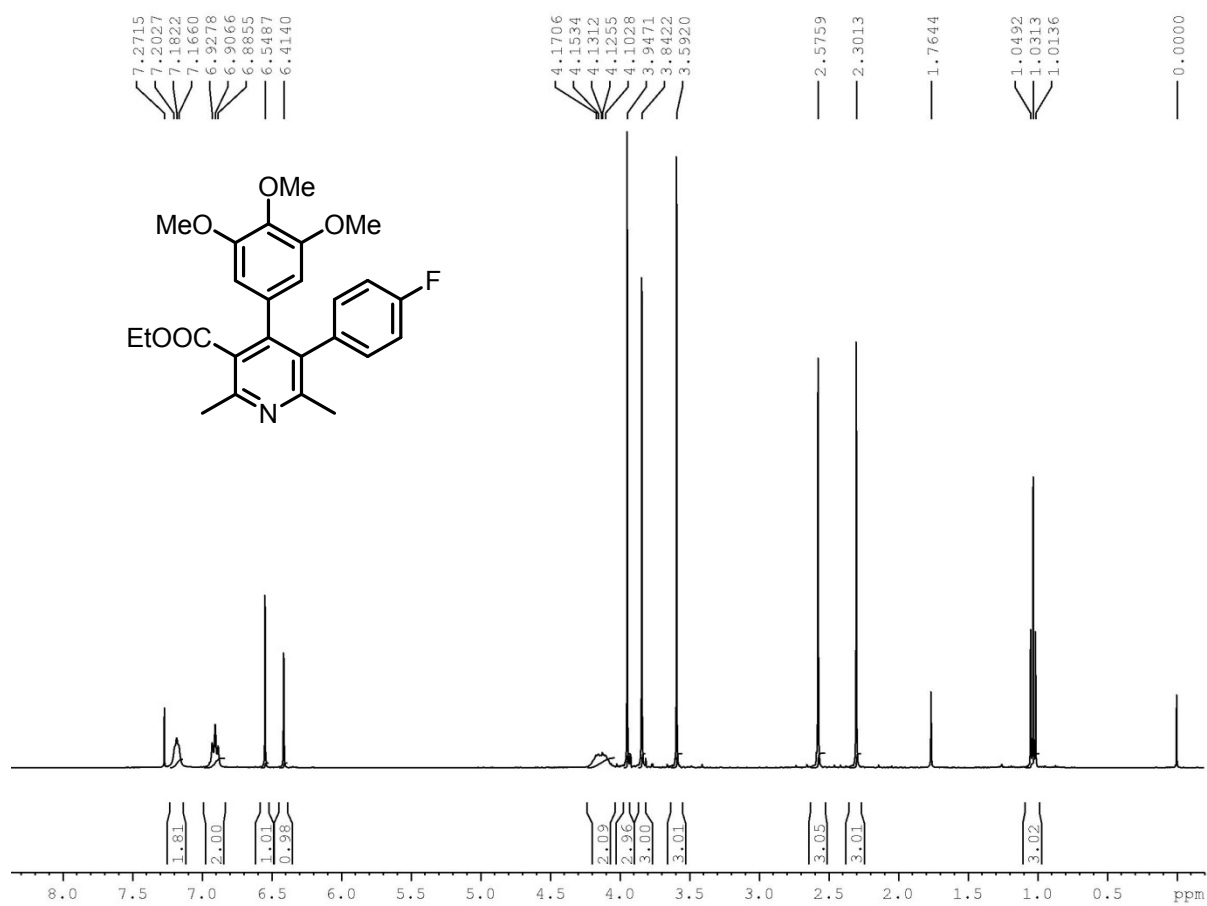

Scheme 4, Entry 9 (8i): <sup>13</sup>C NMR

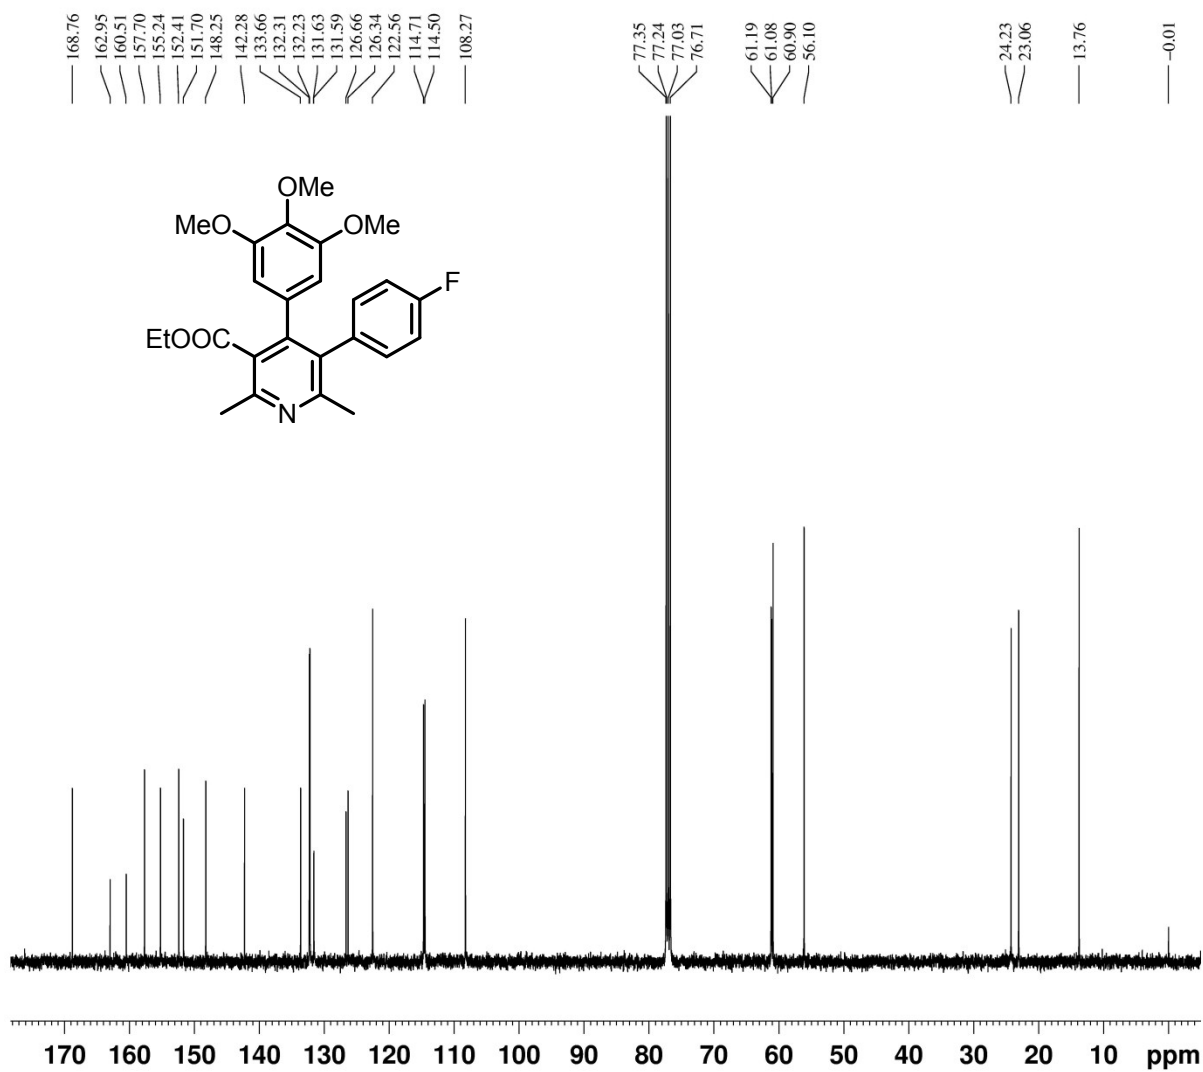

Scheme 4, Entry 10 (8j): <sup>1</sup>H NMR

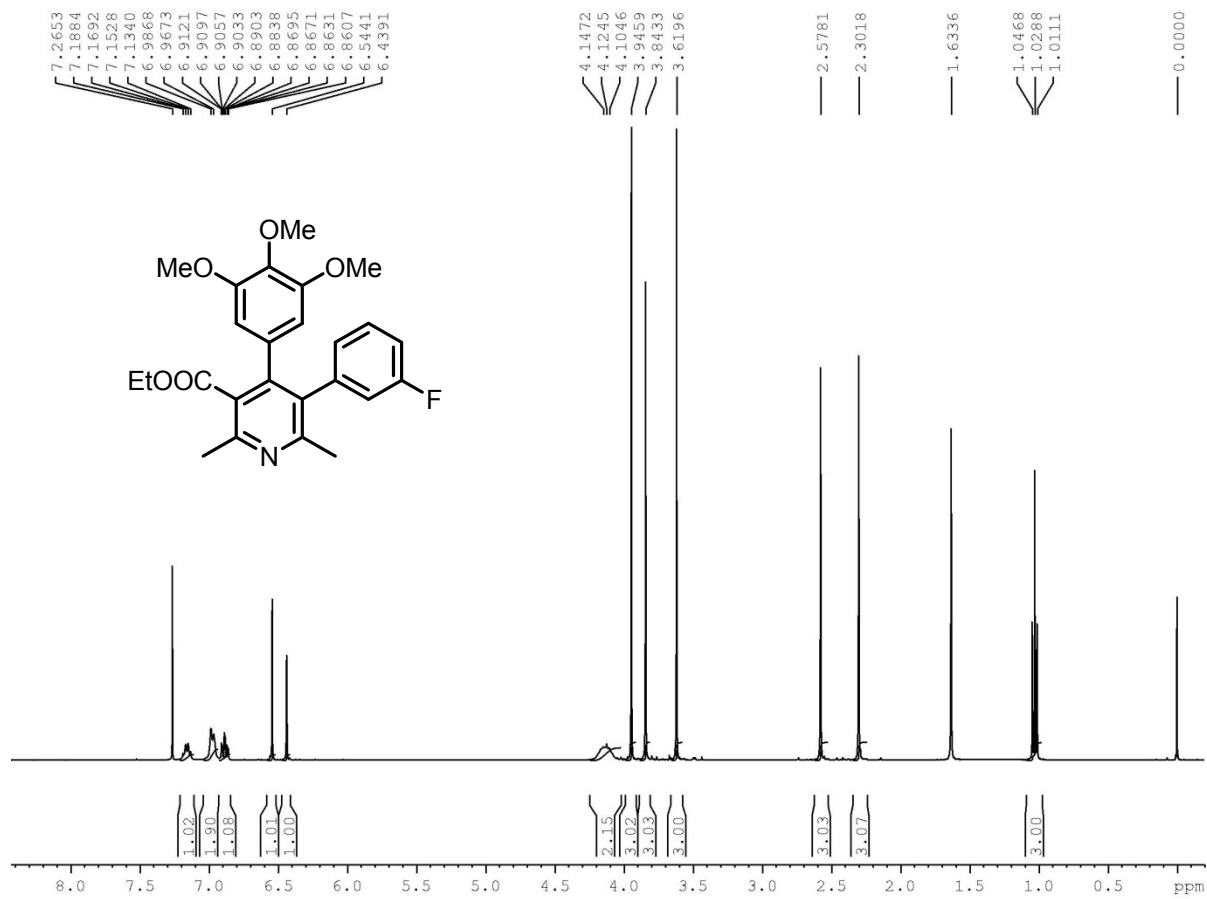

Scheme 4, Entry 10 (8j): <sup>13</sup>C NMR

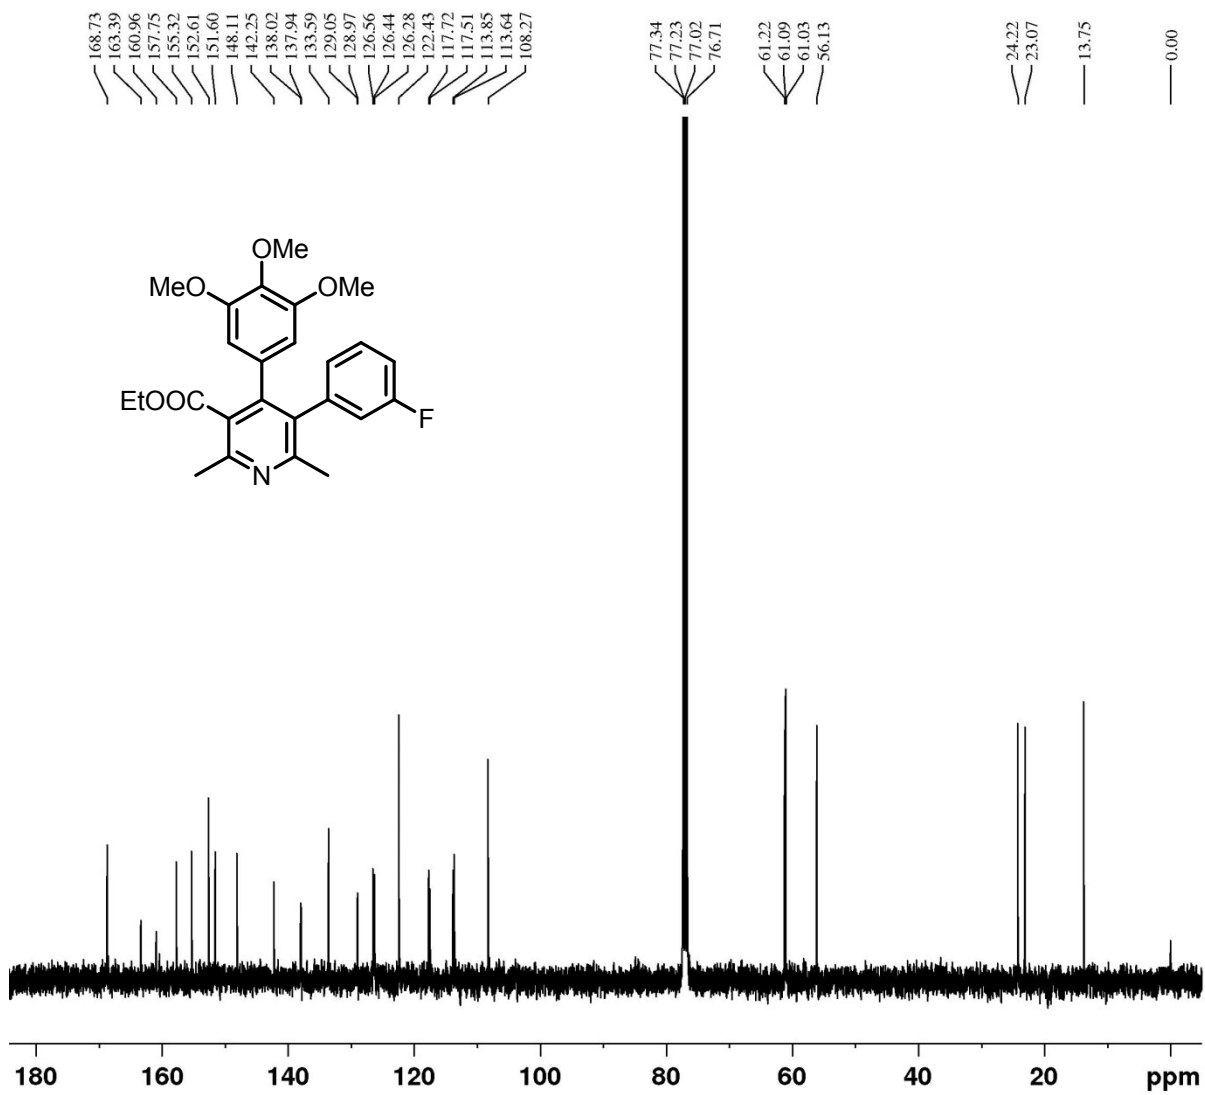

Scheme 4, Entry 11 (8k): <sup>1</sup>H NMR

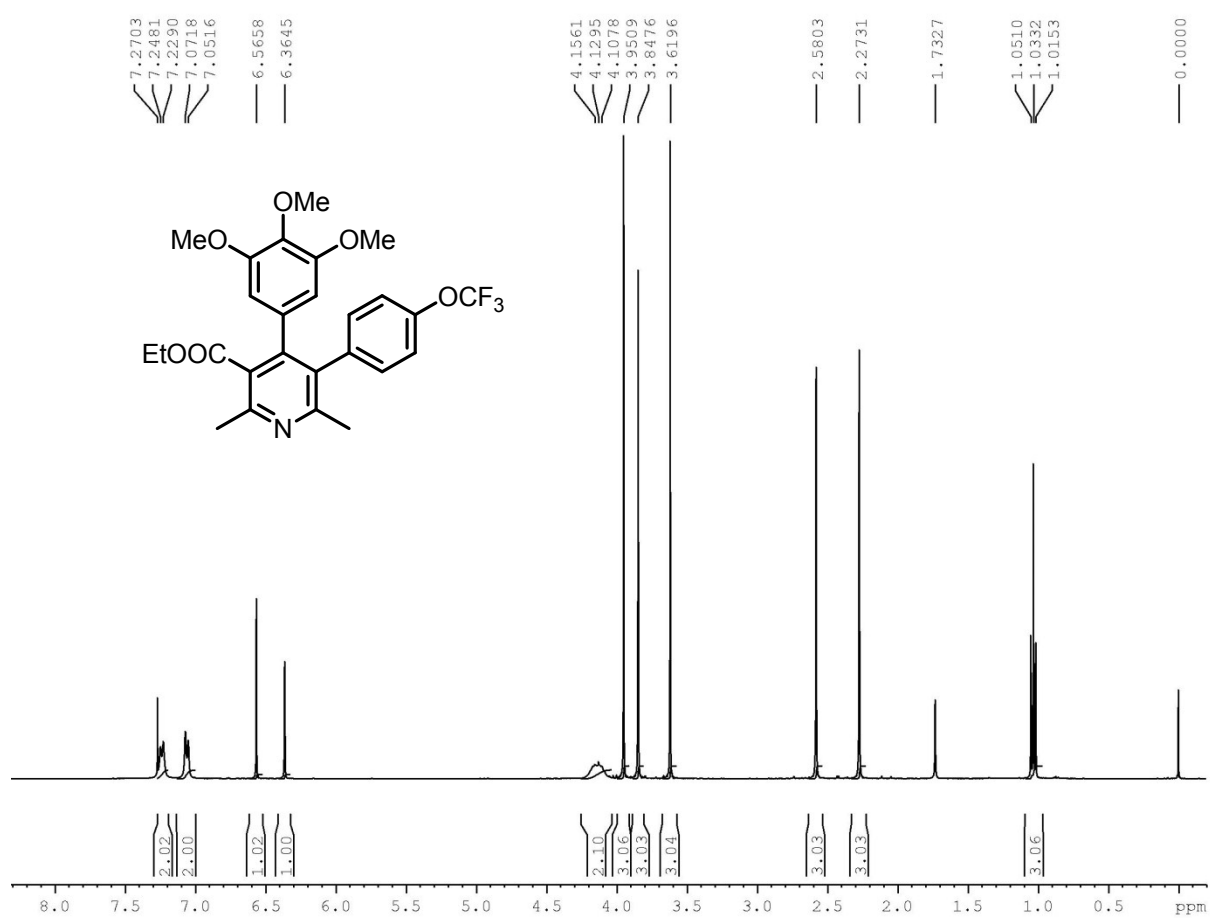



Scheme 4, Entry 11 (8k): <sup>13</sup>C NMR

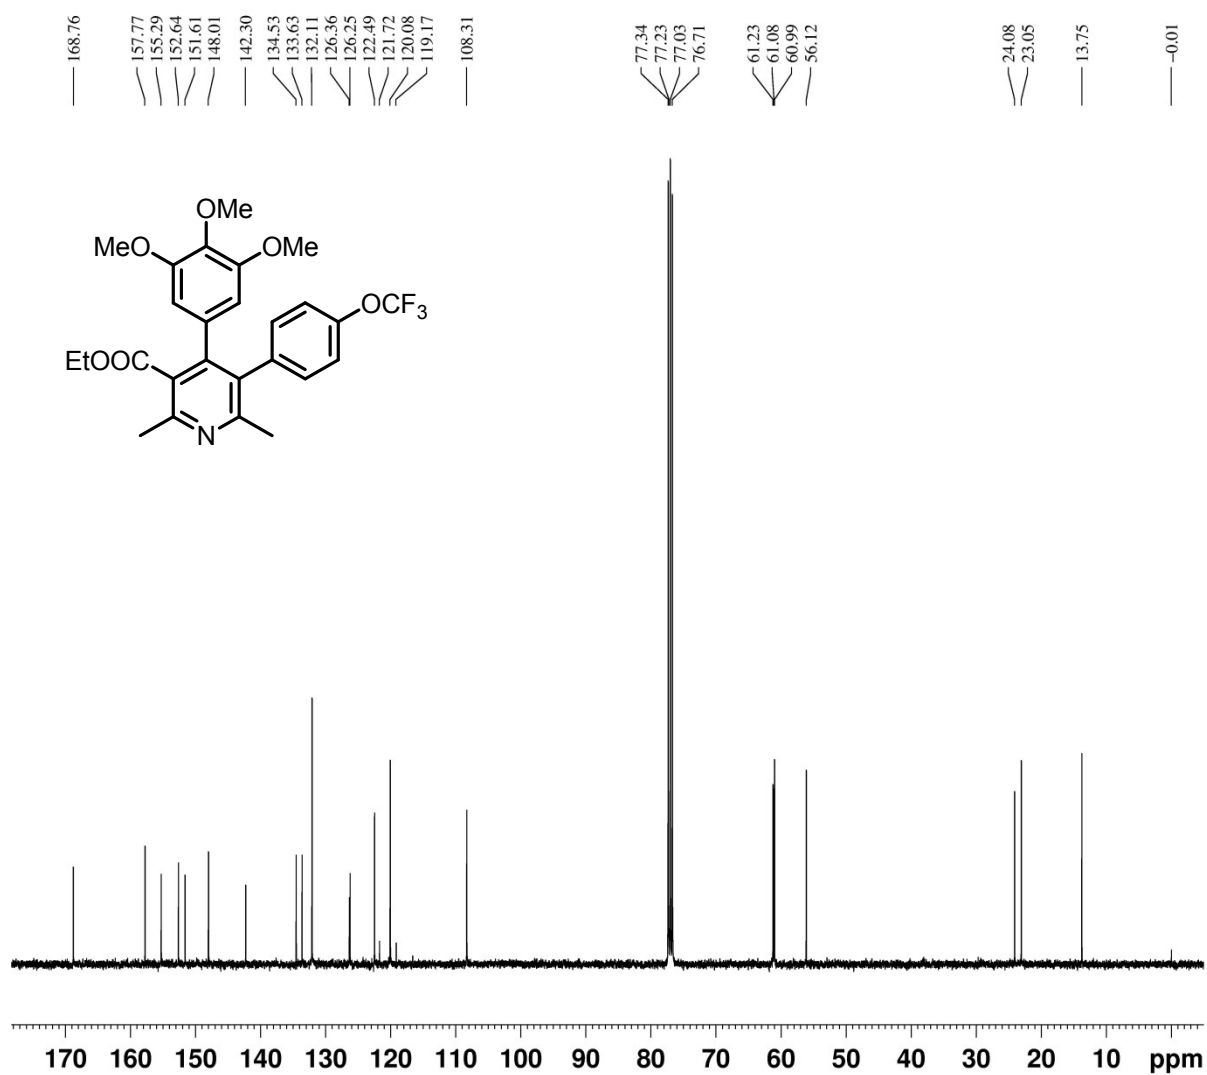

Scheme 4, Entry 12 (8l): <sup>1</sup>H NMR

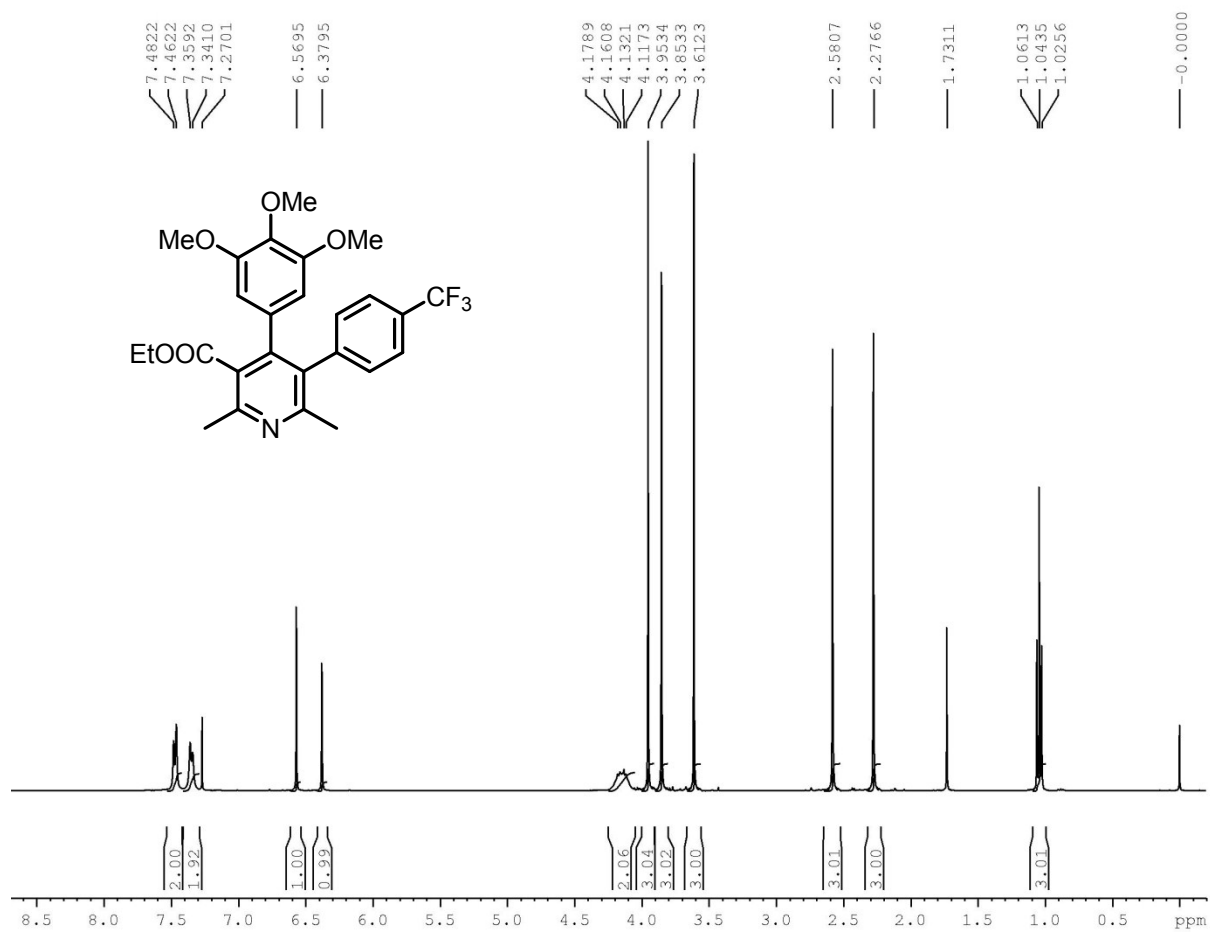

Scheme 4, Entry 12 (81): <sup>13</sup>C NMR

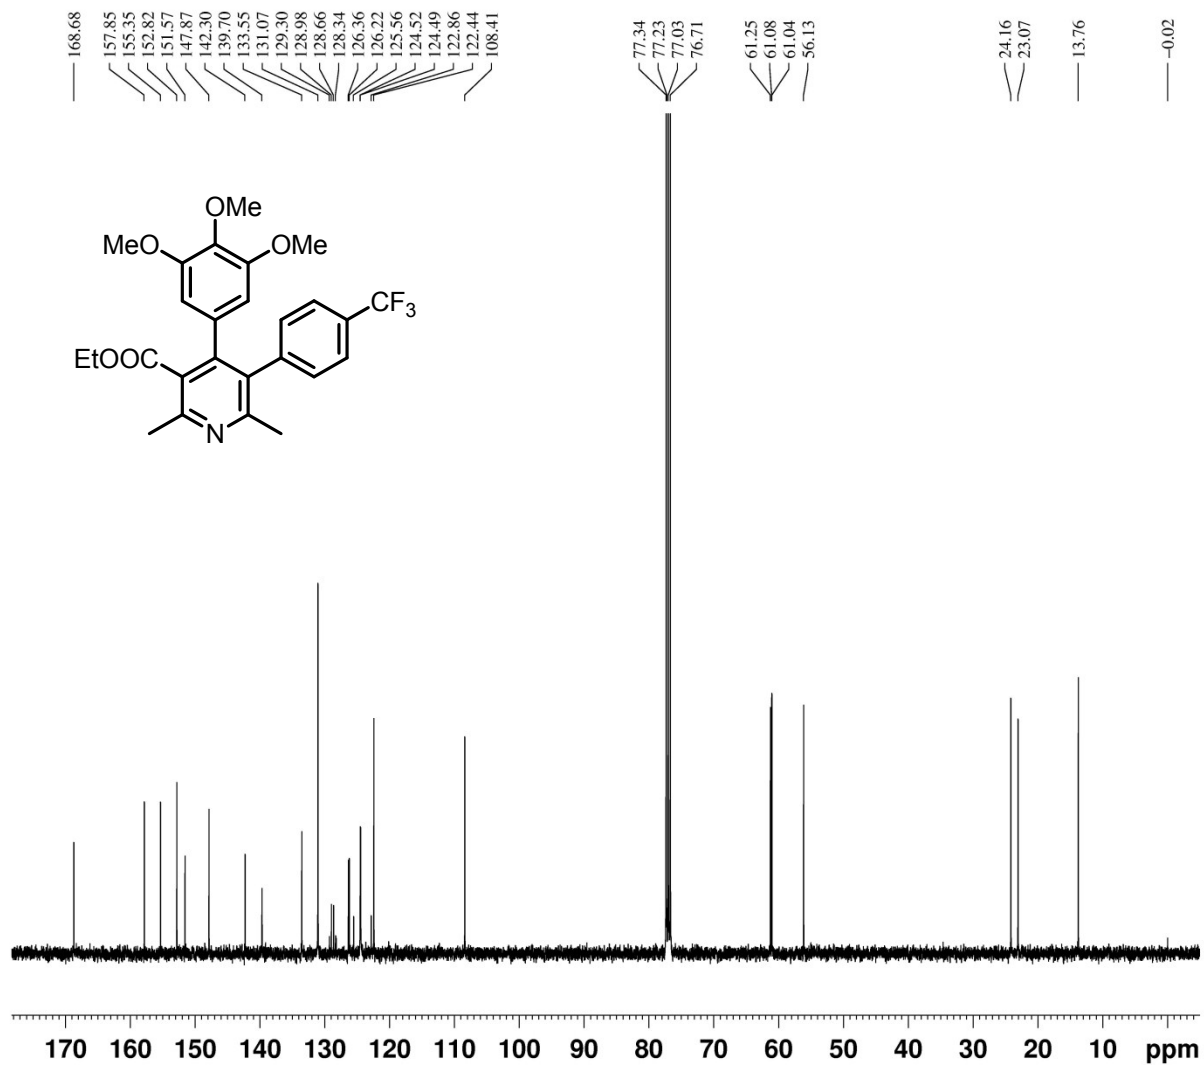

Scheme 4, Entry 13 (8m): <sup>1</sup>H NMR

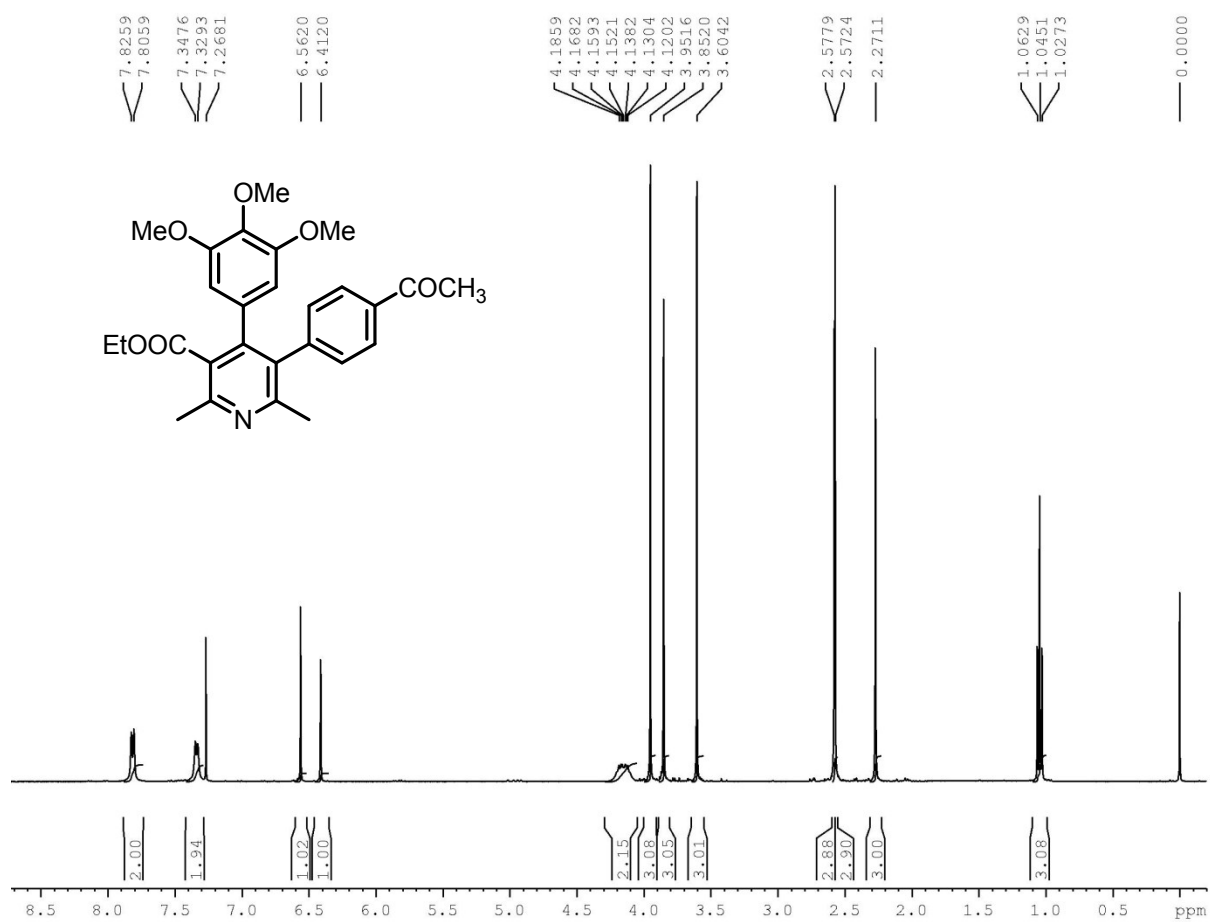

Scheme 4, Entry 13 (8m): <sup>13</sup>C NMR

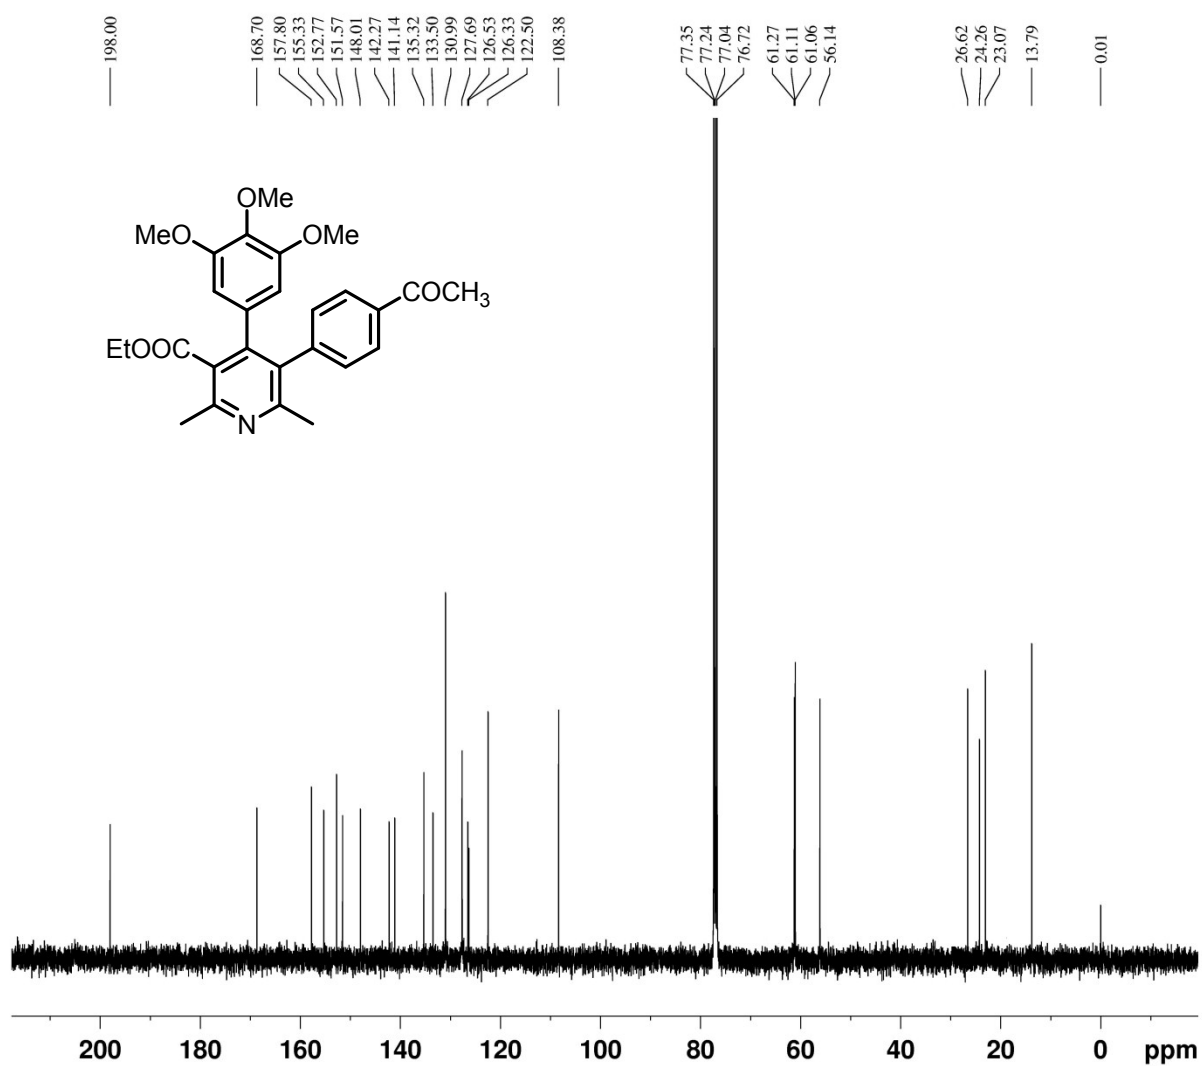

Scheme 4, Entry 14 (8n): <sup>1</sup>H NMR

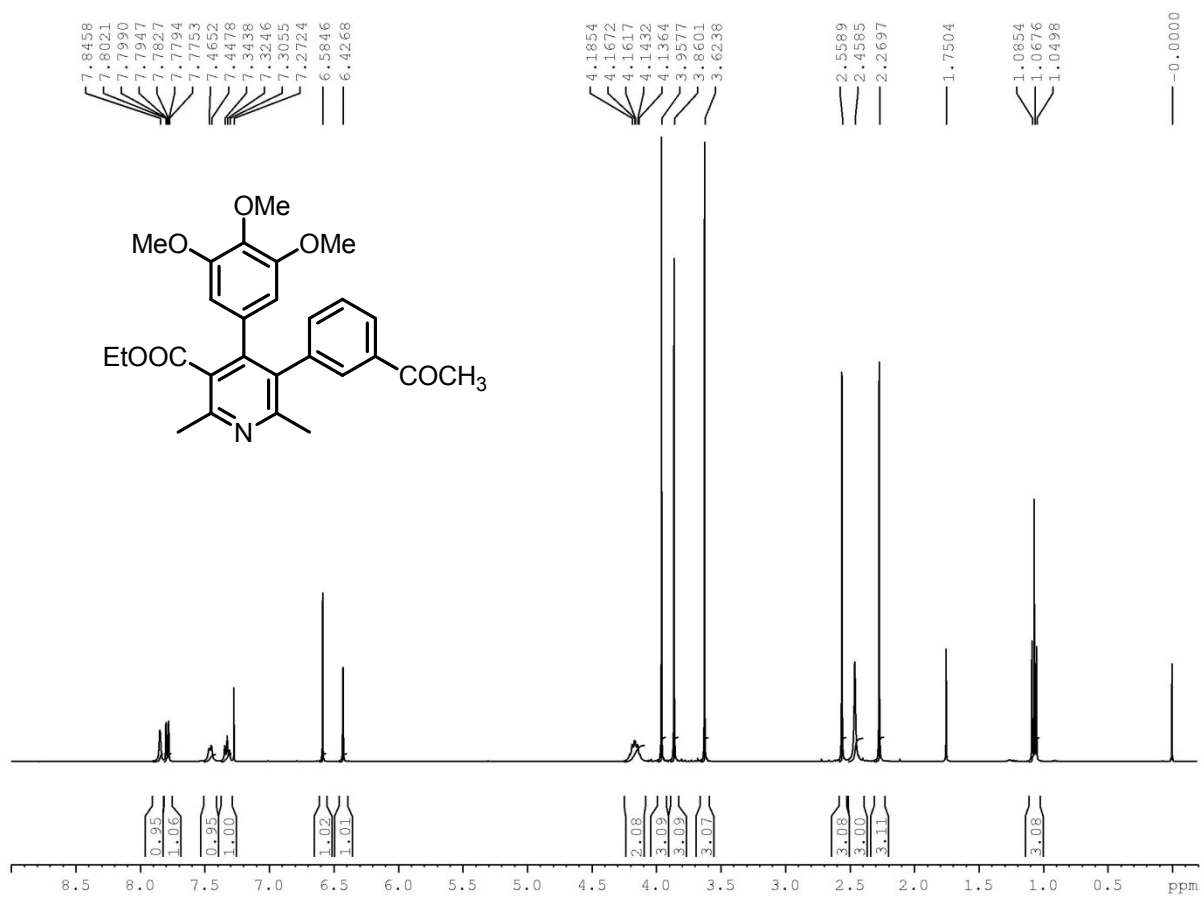

Scheme 4, Entry 14 ( 8n ): <sup>13</sup>C NMR

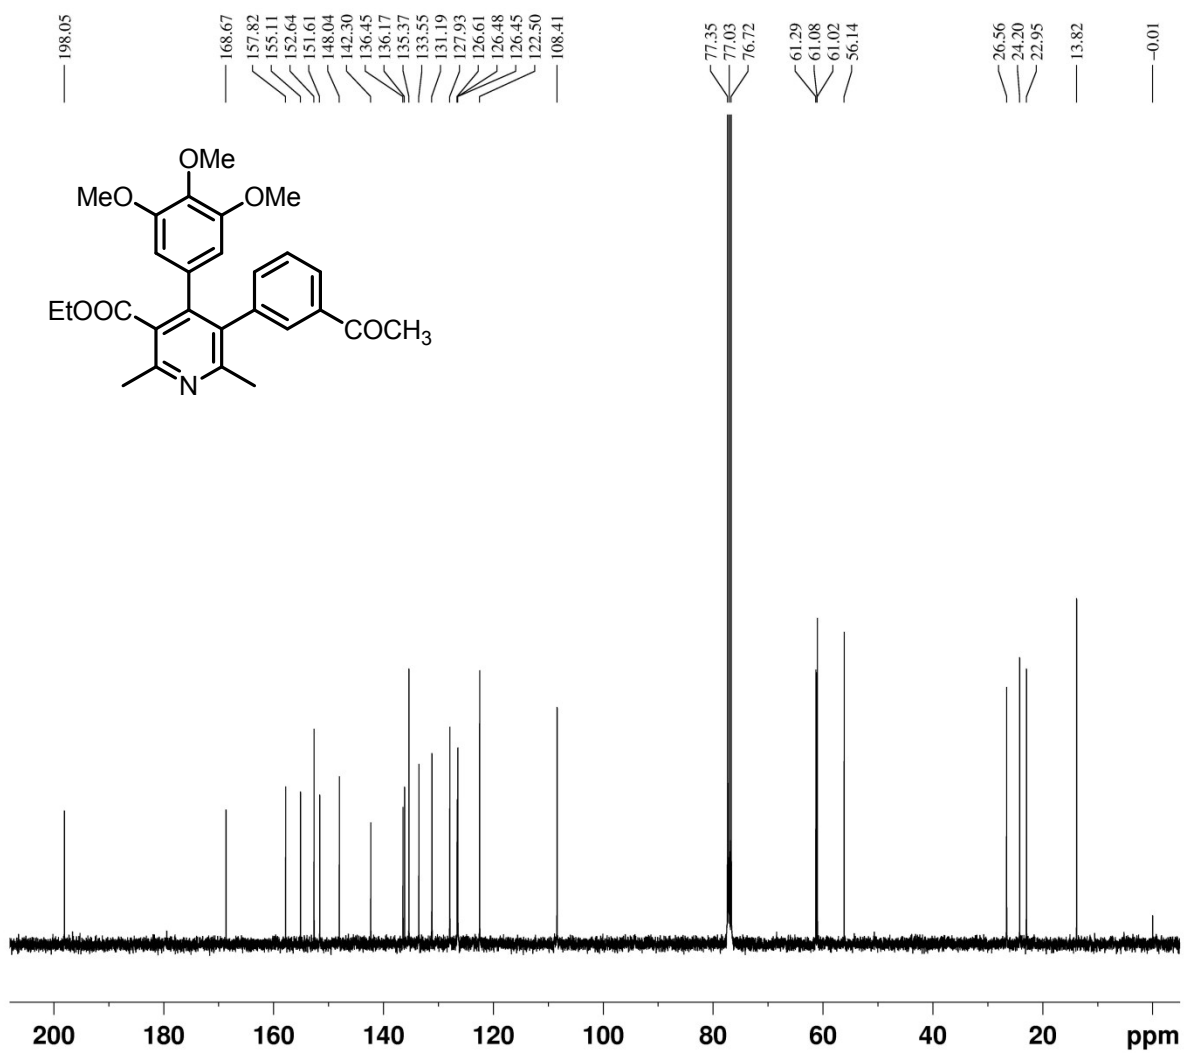

Scheme 4, Entry 15 (8o): <sup>1</sup>H NMR

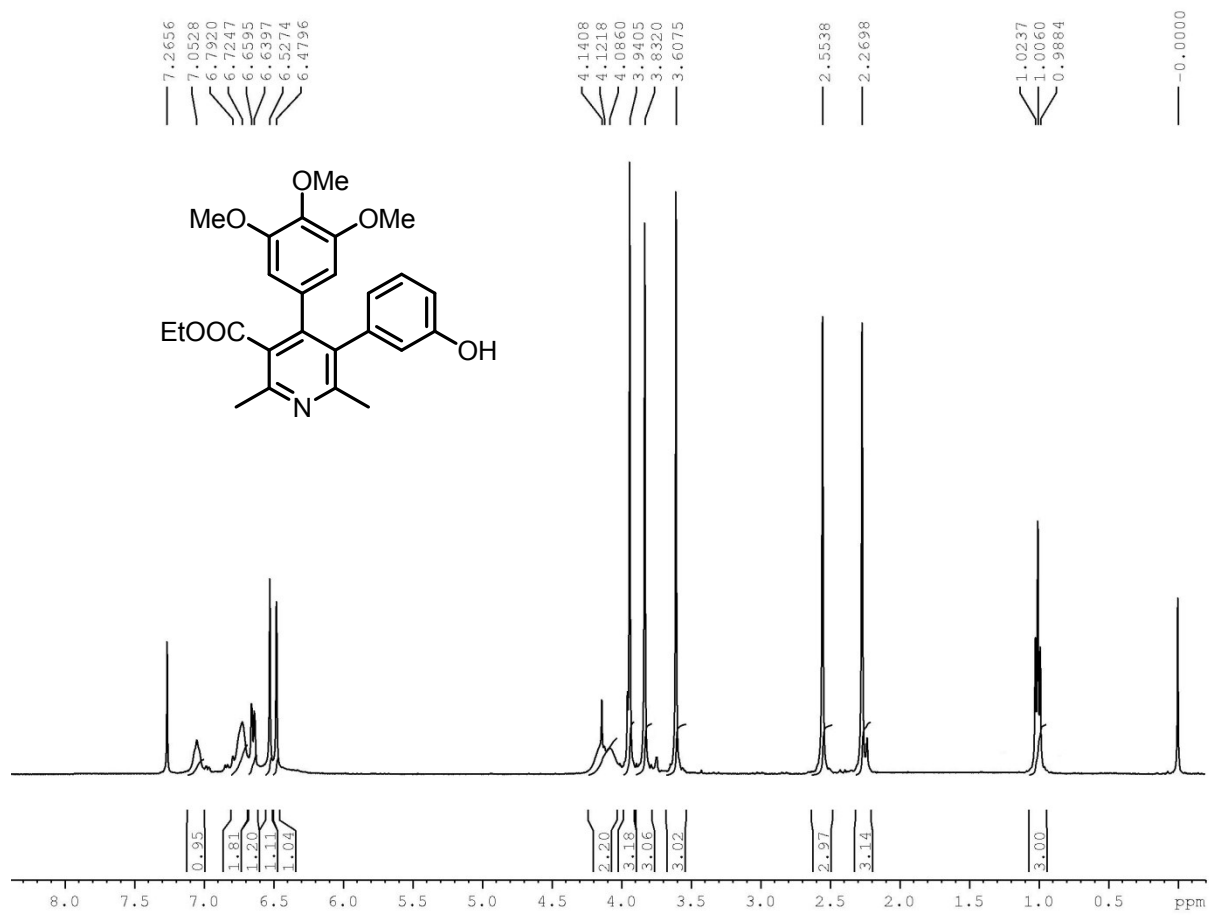



Scheme 4, Entry 15 ( **8o** ):  $^{13}\text{C}$  NMR

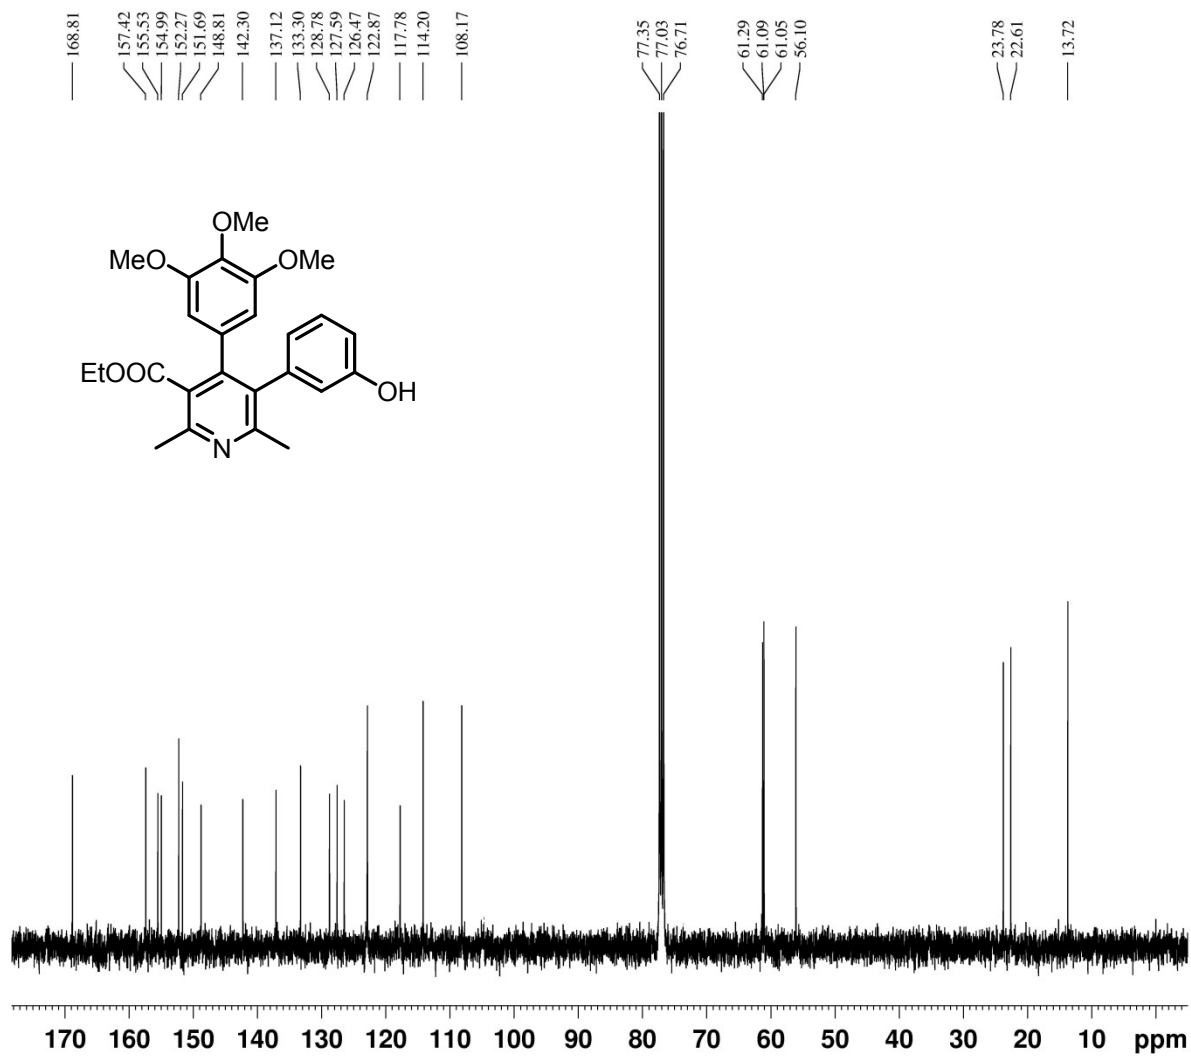

Scheme 4, Entry 16 (8p): <sup>1</sup>H NMR

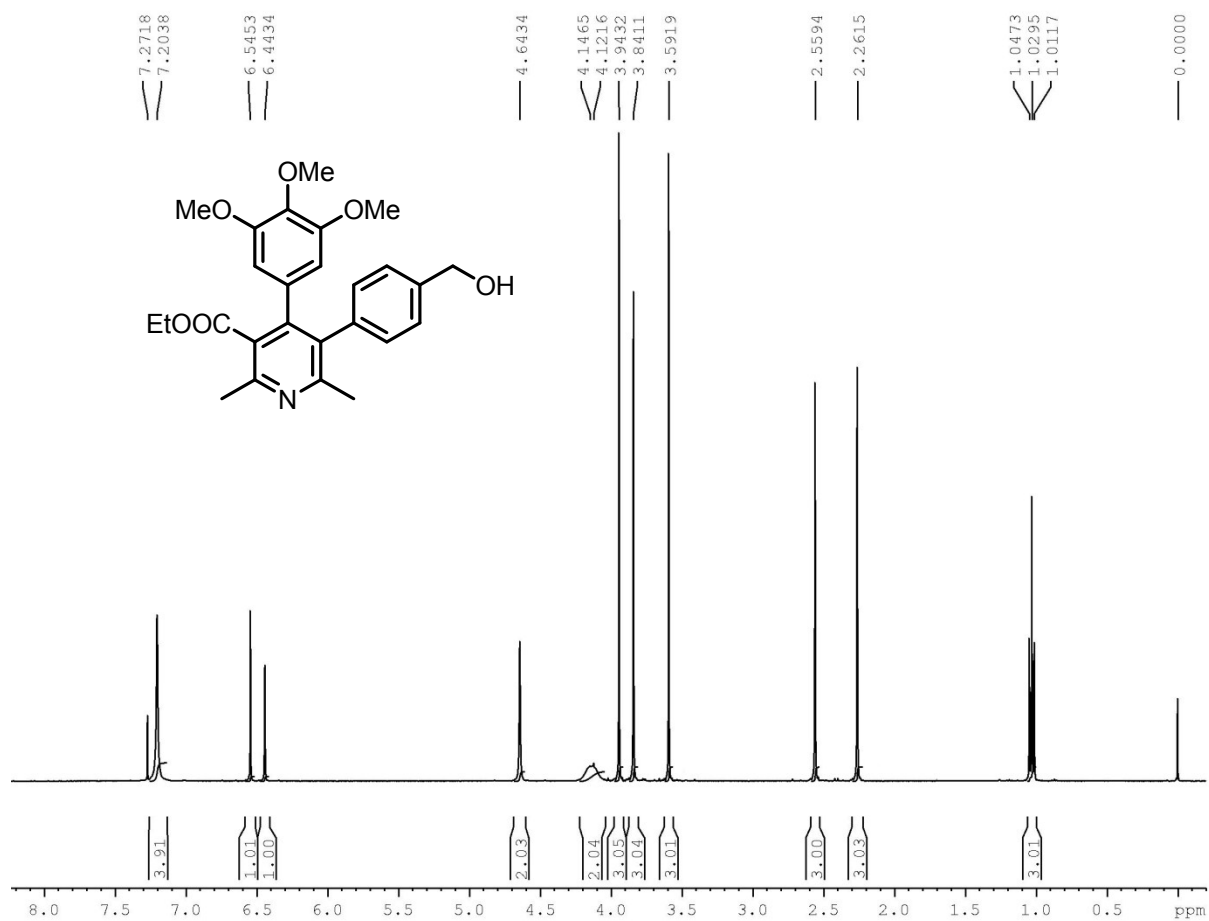

Scheme 4, Entry 16 (8p): <sup>13</sup>C NMR

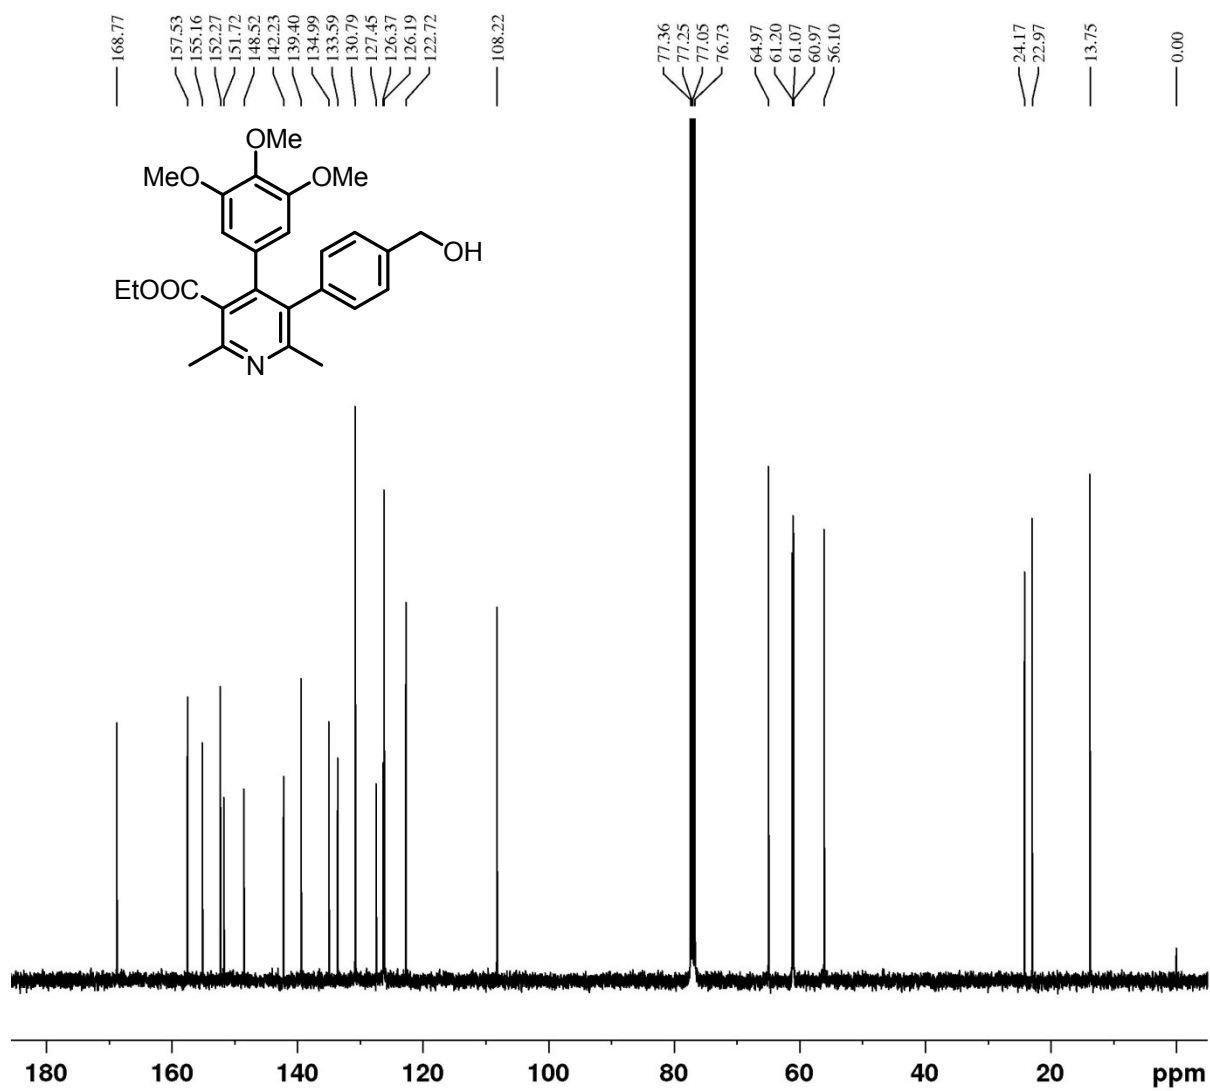

Scheme 4, Entry 17 (8q): <sup>1</sup>H NMR

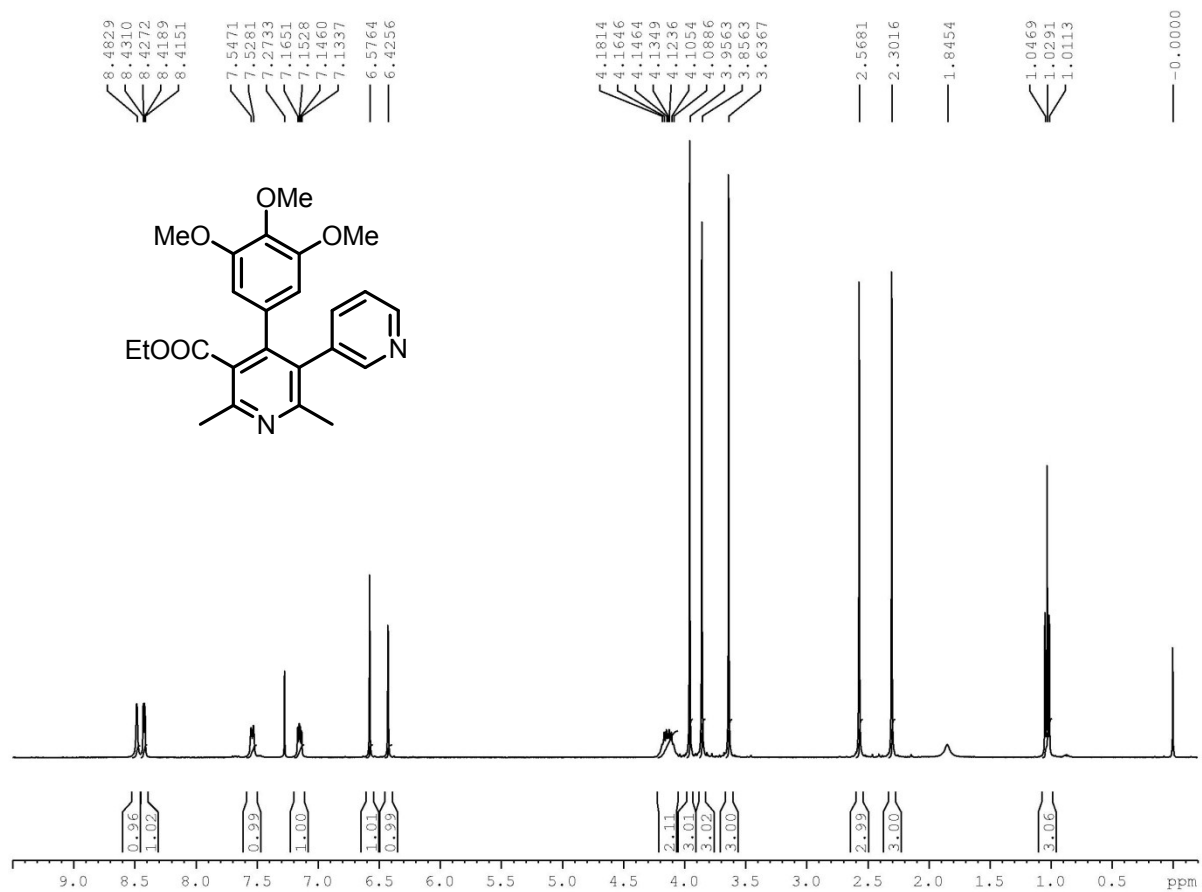

Scheme 4, Entry 17 (8q): <sup>13</sup>C NMR

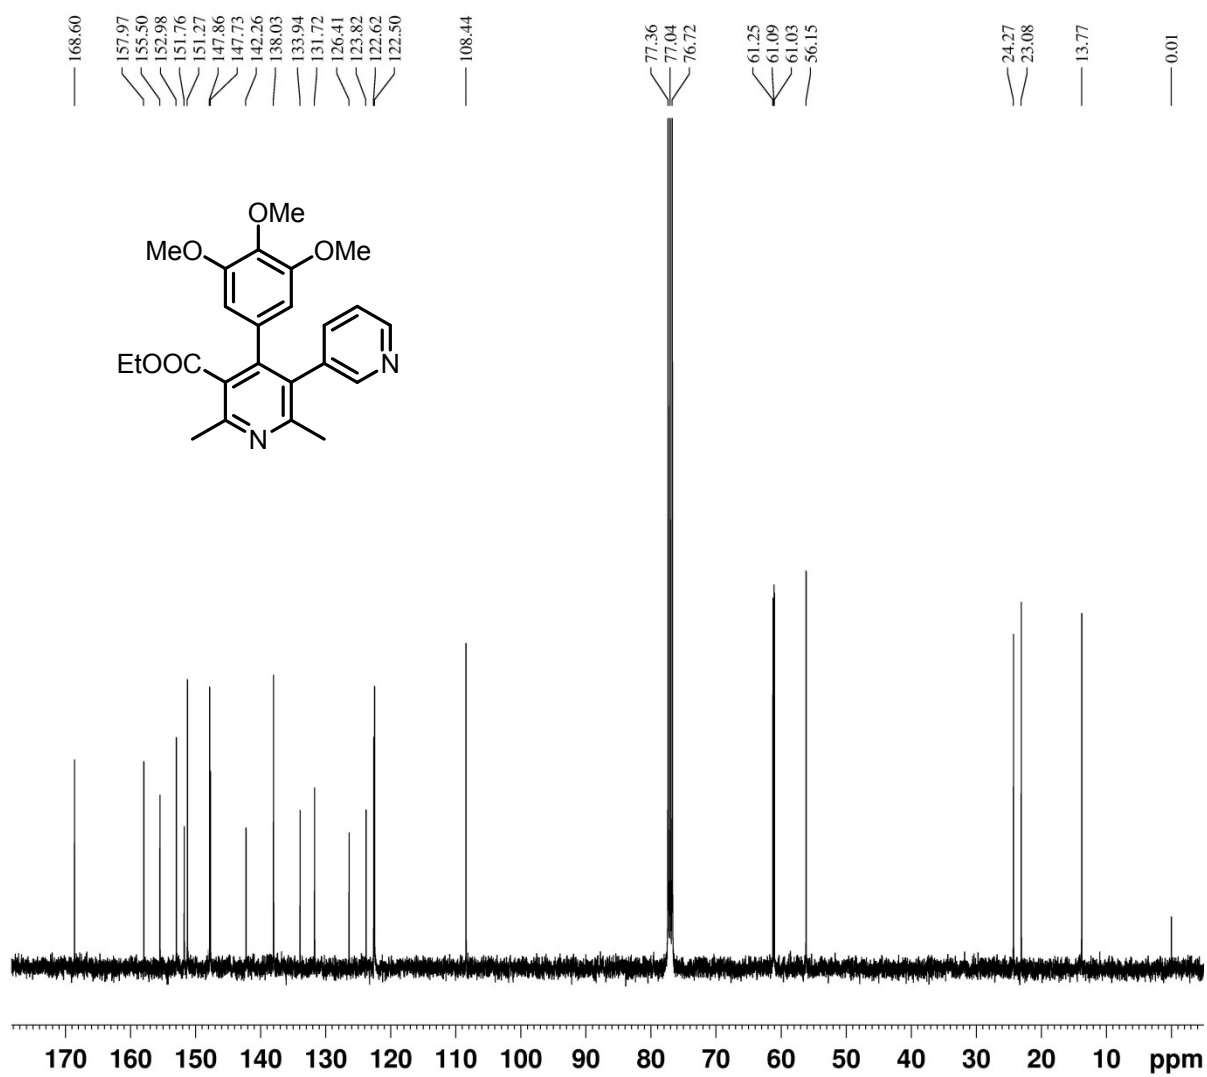

### Scheme 5, 8r: <sup>1</sup>H NMR

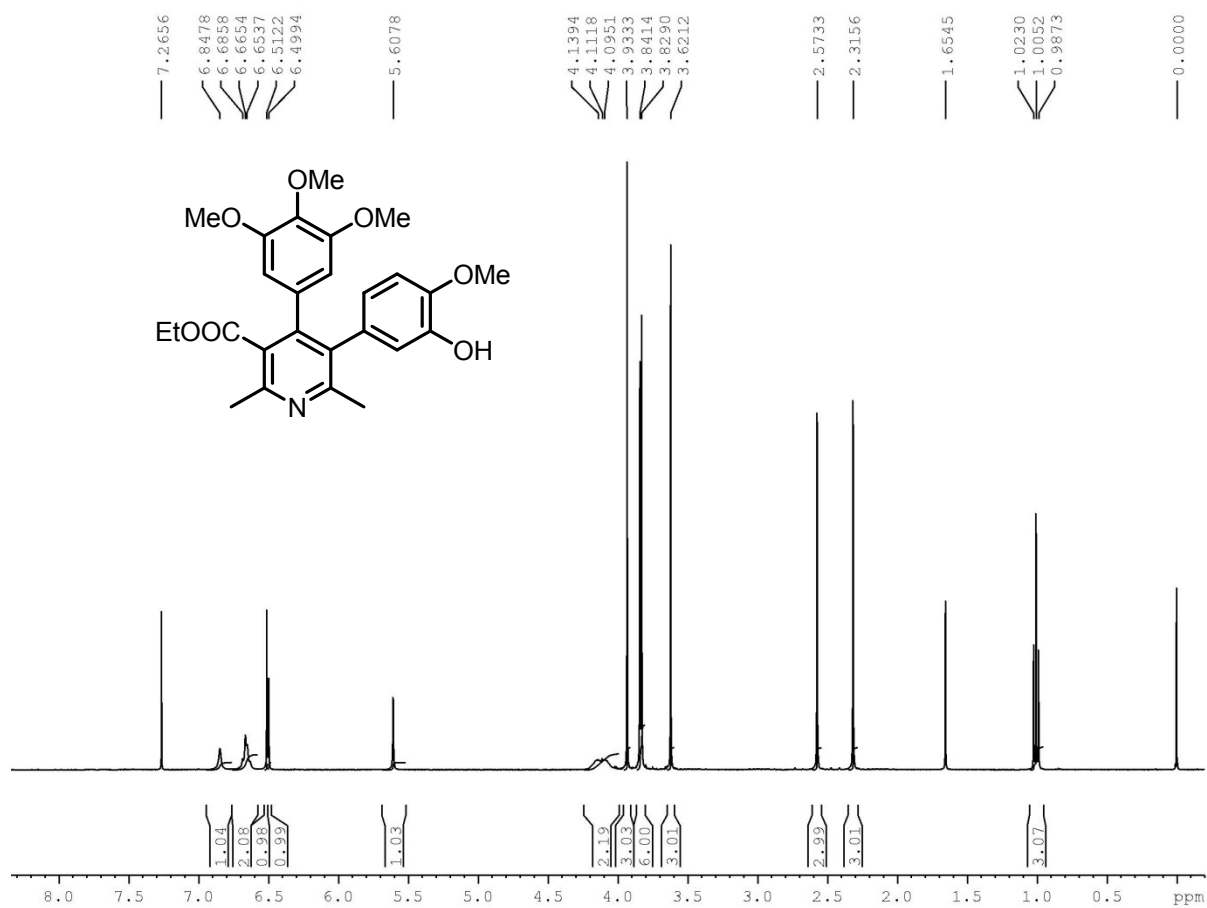

Scheme 5, 8r :  $^{13}\text{C}$  NMR

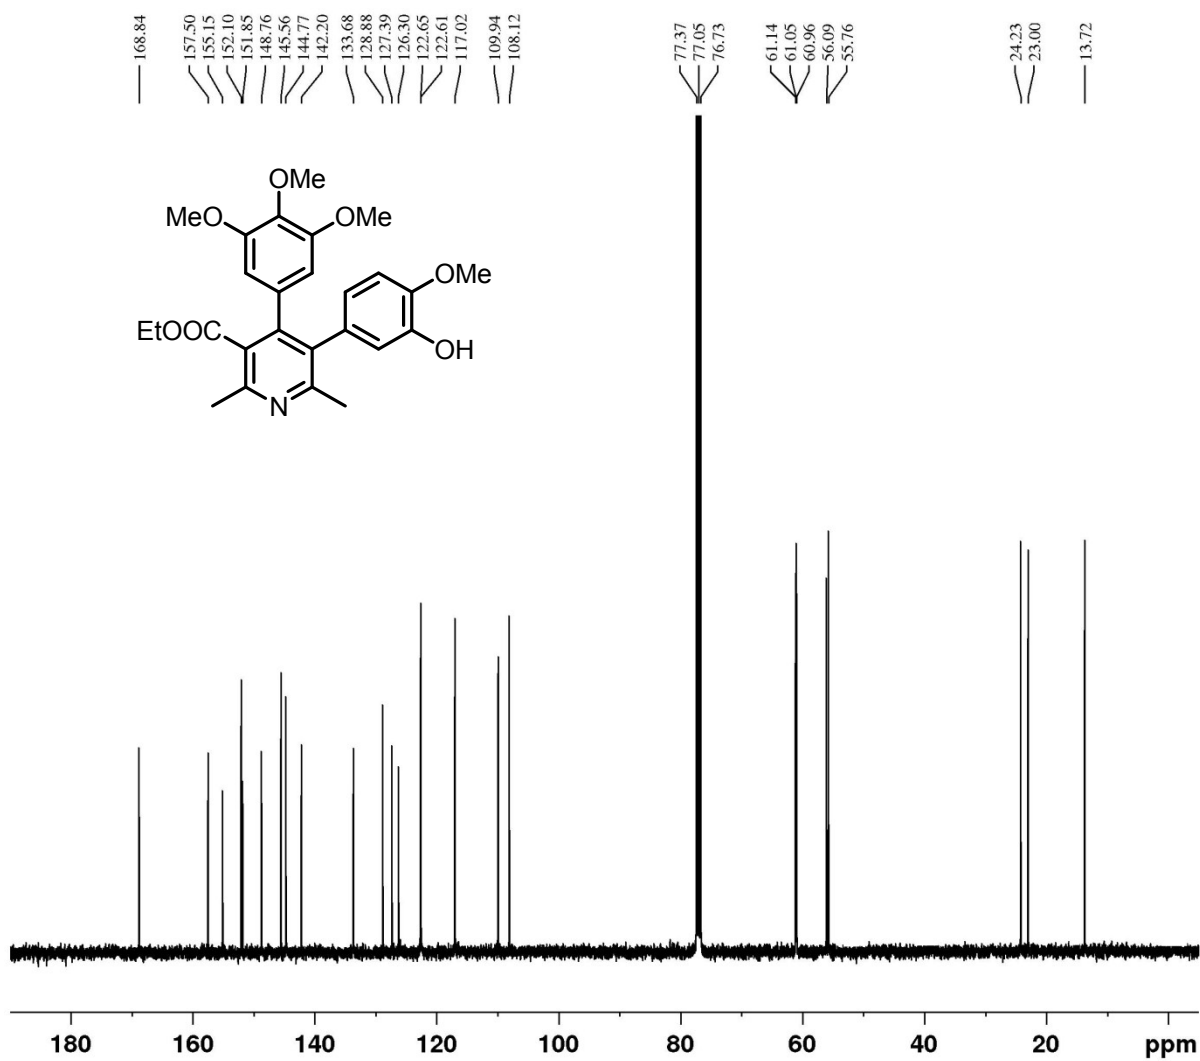

Scheme 6, 8s: <sup>1</sup>H NMR

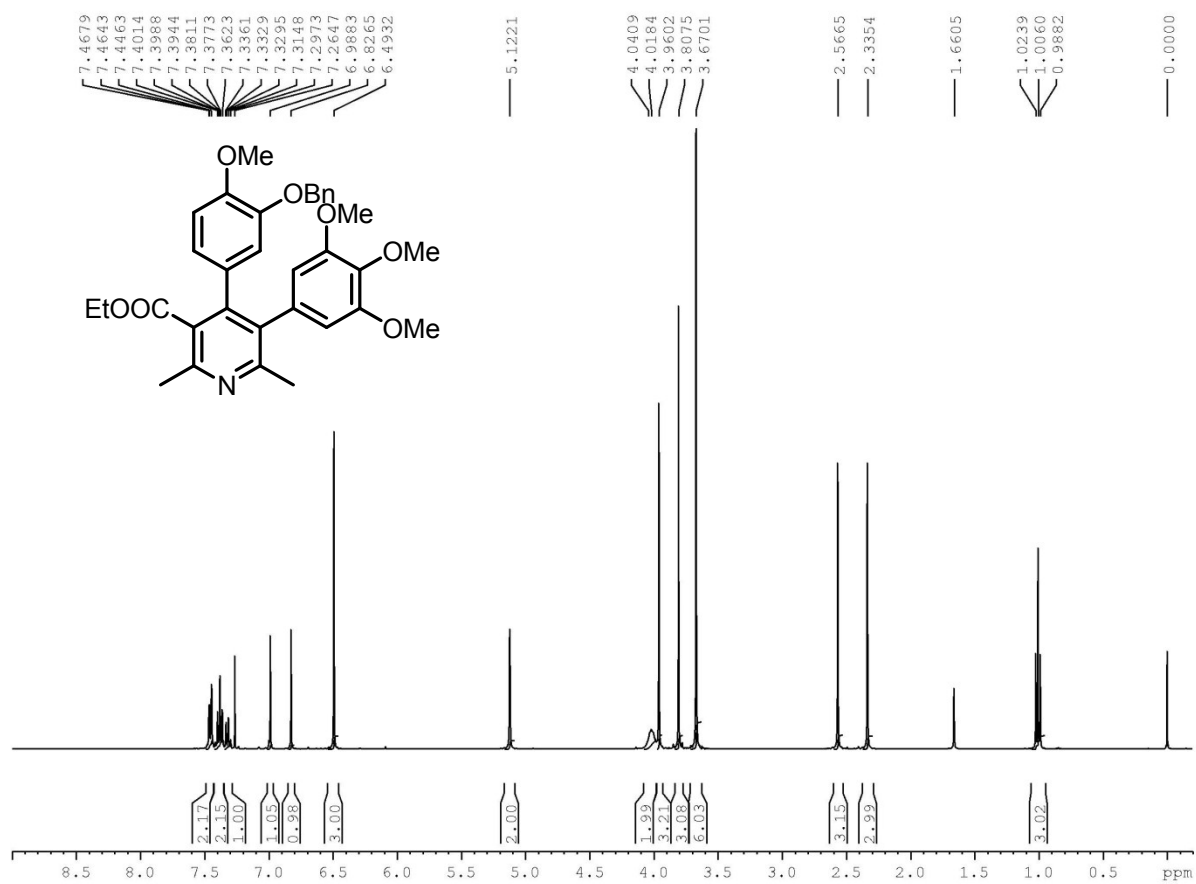



Scheme 6, 8s :  $^{13}\text{C}$  NMR

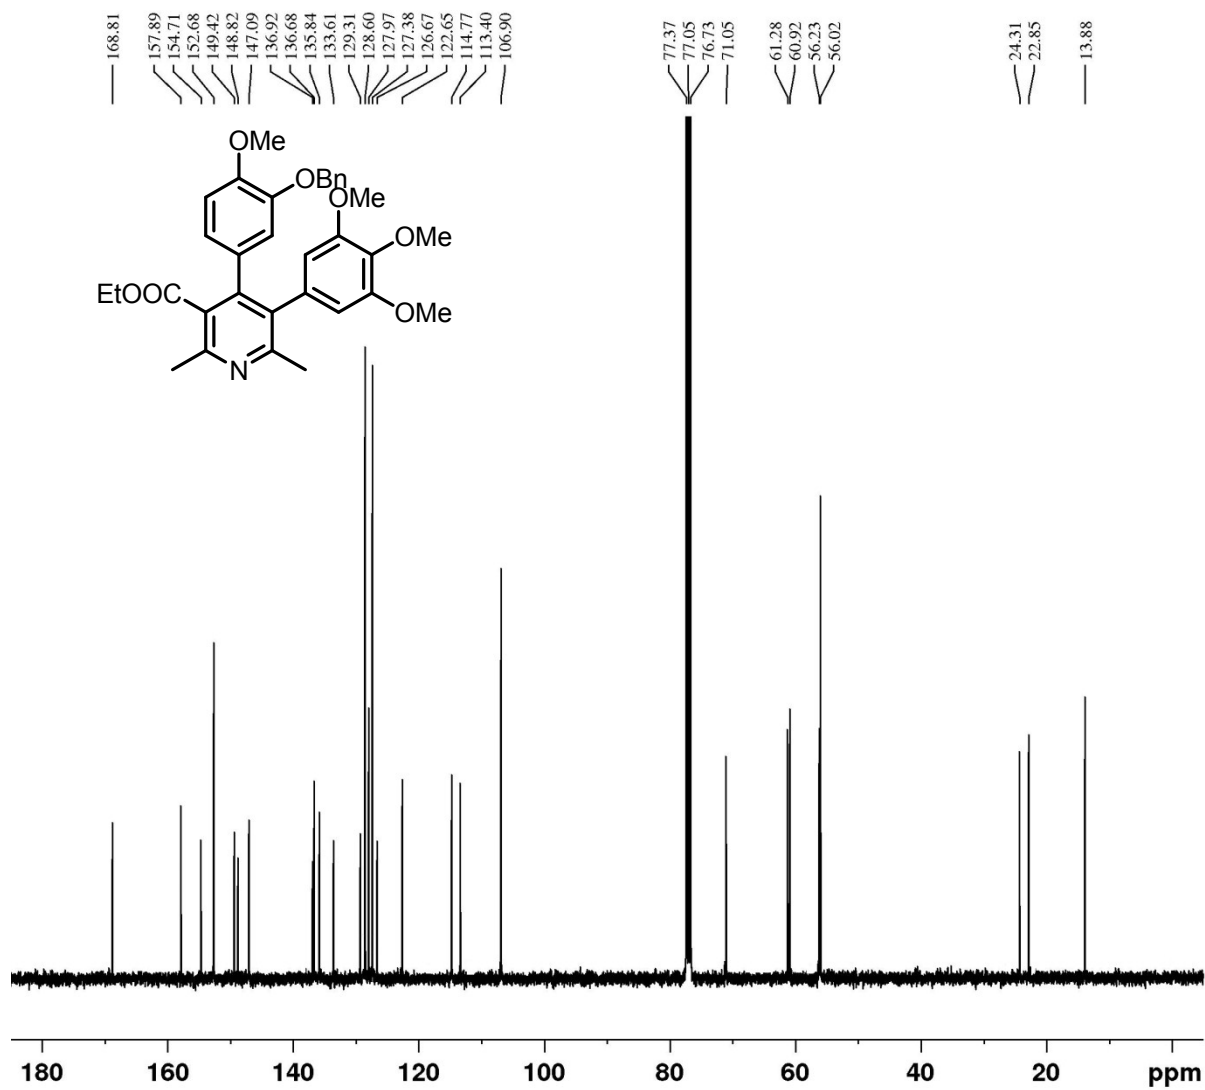

Scheme 6, 8t: <sup>1</sup>H NMR

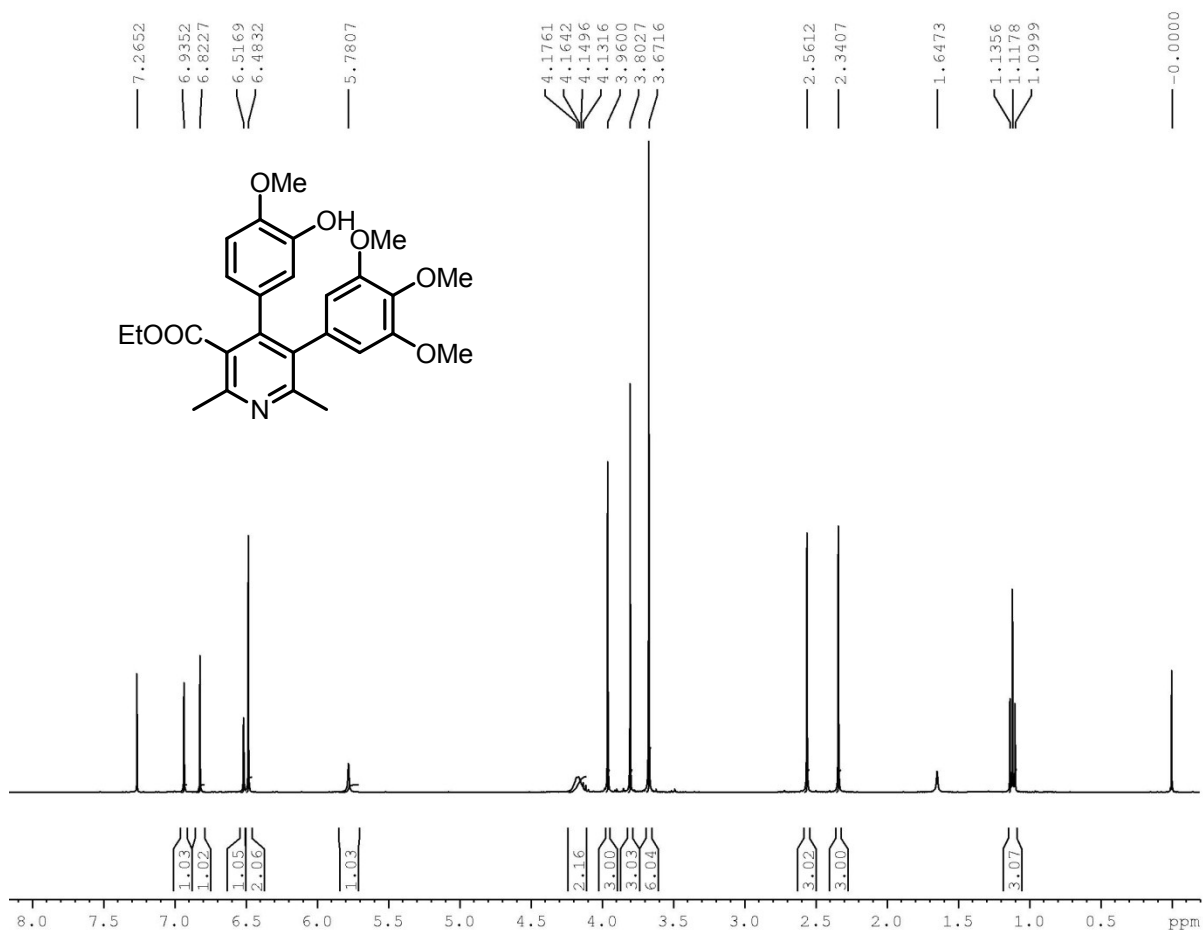

Scheme 6, 8t: <sup>13</sup>C NMR

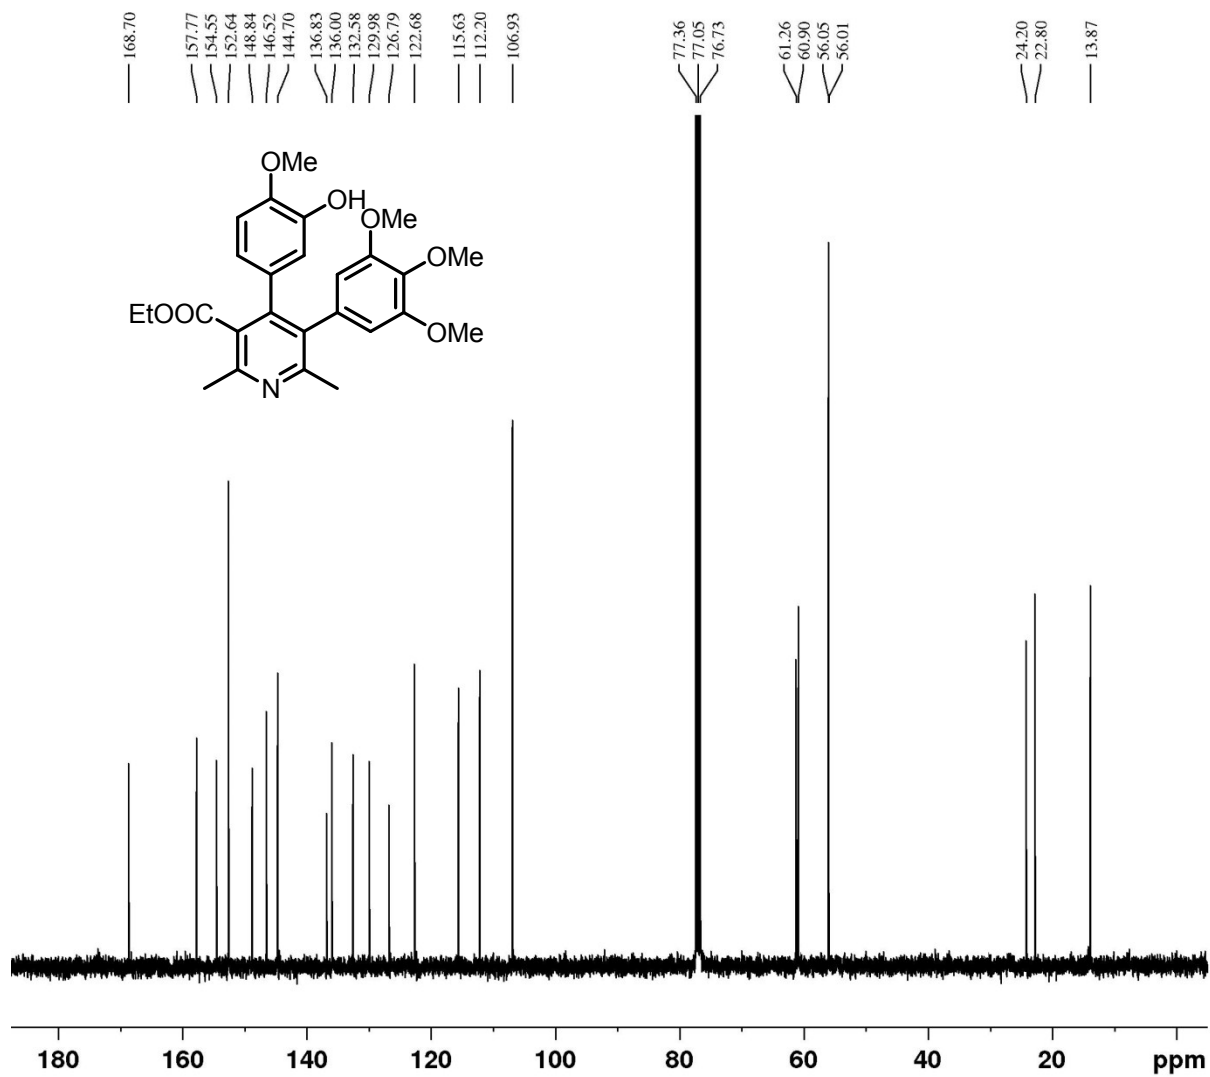

Supplement: c6ra28299g1.pdf [file c6ra28299g1.pdf]
